# 1 **Uterus-specific transcriptional regulation underlies eggshell** 2 **pigment production in Japanese quail**

3 Short title: Molecular basis of eggshell pigment production in Japanese quail

4 Satoshi Ishishita<sup>1</sup>, Shumpei Kitahara<sup>2</sup>, Mayuko Takahashi<sup>2</sup>, Sakura Iwasaki<sup>2</sup>, Shoji Tatsumoto<sup>3</sup>, Izumi  
5 Hara<sup>4</sup>, Yoshiki Kaneko<sup>2</sup>, Keiji Kinoshita<sup>1</sup>, Katsushi Yamaguchi<sup>5</sup>, Akihito Harada<sup>6</sup>, Yasushige Ohmori<sup>4</sup>,  
6 Yasuyuki Ohkawa<sup>6</sup>, Yasuhiro Go<sup>3,7</sup>, Shuji Shigenobu<sup>5</sup>, Yoichi Matsuda<sup>1,2,\*</sup>, Takayuki Suzuki<sup>1,2,\*</sup>

7

8 <sup>1</sup> Avian Bioscience Research Center, Graduate School of Bioagricultural Sciences, Nagoya  
9 University, Furo-cho, Chikusa-ku, Nagoya, Aichi 464-8601, Japan.

10 <sup>2</sup> Laboratory of Avian Bioscience, Department of Animal Sciences, Graduate School of  
11 Bioagricultural Sciences, Nagoya University, Furo-cho, Chikusa-ku, Nagoya, Aichi 464-8601,  
12 Japan.

13 <sup>3</sup> Cognitive Genomics Research Group, Exploratory Research Center on Life and Living Systems  
14 (ExCELLs), National Institutes of Natural Sciences, Okazaki, Aichi 444-8585, Japan.

15 <sup>4</sup> Laboratory of Animal Morphology, Department of Animal Sciences, Graduate School of  
16 Bioagricultural Sciences, Nagoya University, Furo-cho, Chikusa-ku, Nagoya, Aichi 464-8601,  
17 Japan.

18 <sup>5</sup> Functional Genomics Facility, National Institute for Basic Biology (NIBB), Okazaki, Aichi 444-  
19 8585, Japan.

20 <sup>6</sup> Division of Transcriptomics, Medical Institute of Bioregulation, Kyushu University, 3-1-1  
21 Maidashi, Higashi-ku, Fukuoka, Fukuoka 812-0054, Japan.

22 <sup>7</sup> Division of Behavioral Development, Department of System Neuroscience, National Institute  
23 for Physiological Sciences, Okazaki, Aichi 444-8585, Japan.

24

25 \*Corresponding authors:

26 Email address: [suzuki.takayuki@j.mbox.nagoya-u.ac.jp](mailto:suzuki.takayuki@j.mbox.nagoya-u.ac.jp) (TS), [yoimatsu@agr.nagoya-u.ac.jp](mailto:yoimatsu@agr.nagoya-u.ac.jp)

27 (YM)

28

## 29 **Abstract**

30 The precursor of heme, protoporphyrin IX (PPIX), accumulates abundantly in the uterus of birds,  
31 such as Japanese quail, *Coturnix japonica*, resulting in brown-speckled eggshells. The molecular  
32 basis of PPIX production in the uterus remains largely unknown. Here, we investigated the cause  
33 of low PPIX production in a classical Japanese quail mutant exhibiting white eggshells by  
34 comparing its gene expression in the uterus with that of the wild type using transcriptome  
35 analysis and performed genetic linkage mapping to identify the causative genomic region of the  
36 white eggshell phenotype. We showed that 11 genes, including the *5-aminolevulinic acid*  
37 *synthase 1 (ALAS1)* and ferroxidase *hephaestin-like 1 (HEPHL1)* genes, were specifically  
38 upregulated in the wild-type uterus and downregulated in the mutant. We mapped the 172 kb  
39 candidate genomic region on chromosome 6, which contains several genes, including a part of  
40 the *paired-like homeodomain 3 (PITX3)*, which encodes a transcription factor. *ALAS1*, *HEPHL1*,  
41 and *PITX3* were expressed in the apical cells of the luminal epithelium and lamina propria cells  
42 of the uterine mucosa of the wild-type quail, and their expression was downregulated in these  
43 cells of the mutant quail. Biochemical analysis using uterine homogenates indicated that the  
44 restricted availability of 5-aminolevulinic acid is the main cause of low PPIX production. These  
45 results suggest that uterus-specific transcriptional regulation of heme-biosynthesis-related genes  
46 is an evolutionarily acquired mechanism of eggshell pigment production in Japanese quail.

47

## 48 **Introduction**

49 Avian eggshells display diverse color and color patterns, which may be a result of adaptation to  
50 habitats by birds. Eggshell colors have various functions, including avoiding predation

51 (camouflage) and promoting egg recognition by parents [1–3]. Elucidating the molecular and  
52 cellular basis for eggshell pigmentation is essential for understanding the evolutionary processes  
53 and mechanisms of eggshell coloration; however, it remains largely unknown [4–6]. Avian  
54 eggshell pigments are mainly composed of intermediates and/or catabolites of heme, including  
55 protoporphyrin IX (PPIX), an organic compound comprising four pyrrole rings, which is  
56 observed as brown-colored pigment on the eggshell [7–9]. PPIX is the final intermediate in the  
57 eight-step heme biosynthesis pathway (S1 Fig), wherein the insertion of iron into PPIX generates  
58 heme, a component of hemoproteins [10]. PPIX levels are low in most tissues because heme  
59 biosynthesis is tightly regulated to avoid the toxic effect of PPIX accumulation [11], and the  
60 synthesized PPIX is efficiently converted to heme in the presence of ferrous iron. Exceptionally,  
61 PPIX accumulates in the uterus—especially in the caudal part of the oviduct—of bird species that  
62 produce brown eggs, indicating that the biosynthesis pathway of heme is specifically regulated in  
63 their uteri. The Japanese quail, *Coturnix japonica*, usually lays eggs with brown-speckled color  
64 patterns generated by PPIX. In the uterus of this species, a large amount of PPIX accumulates in  
65 the apical cells of the mucosal epithelium before its secretion [12, 13]. To elucidate the molecular  
66 basis of PPIX production in the uterus of Japanese quail, we focused on a classical quail mutant  
67 exhibiting white eggshells owing to the low PPIX production in the uterus [14, 15]. In this mutant  
68 quail, the cause of low PPIX production remains unknown. We postulated that the genes involved  
69 in PPIX production should be specifically upregulated in the uterus of wild-type quail and  
70 downregulated in the mutant quail exhibiting white eggshells. Therefore, in this study, we first  
71 compared the gene expression patterns between wild-type and mutant quail uteri by  
72 transcriptome analysis. Next, we performed a genetic linkage mapping of the causative genomic  
73 region of the white eggshell phenotype and attempted to identify the candidate gene.

74

## 75 **Materials & methods**

### 76 **General**

77 No statistical methods were used to predetermine the sample size, and the experiments were not  
78 randomized. The investigators were not blinded to the allocation during the experiments and  
79 outcome assessment.

### 80 **Ethics statement**

81 Animal care and all experimental procedures were approved by the Animal Experiment  
82 Committee, Graduate School of Bioagricultural Sciences, Nagoya University (approval number:  
83 2017030238). Experiments were conducted according to the Regulations on Animal Experiments  
84 in Nagoya University.

### 85 **Animals**

86 Commercial female quails were purchased from a local hatchery (Cyubu-kagaku-shizai, Nagoya,  
87 Japan), and female quail strains (WE, NIES-L, and NIES-Fr) [16–18] were supplied by the  
88 National BioResource Project Chicken/Quail, Nagoya University, Japan. The commercial quail  
89 and the NIES-L and NIES-Fr strains exhibited wild-type eggshells, whereas the WE strain  
90 exhibited white eggshells. All quails were unvaccinated and were maintained individually with  
91 free access to water and a commercially available diet. Most quails were maintained under a  
92 14:10 h light/dark photoperiod; however, some were maintained under a 16:8 h light/dark  
93 photoperiod for use with quantitative PCR (qPCR) analysis. Room temperature (RT) was

94 maintained at approximately 25 °C. Continuously laying quails that were 16–48 weeks old were  
95 used for the animal experiments. It should be noted that a superficial layer of pigment is formed  
96 on the shell at approximately 21–22 h following the last oviposition in Japanese quail [19–21].

## 97 **mRNA sequencing**

98 For mRNA sequencing, females of both the commercial quail (exhibiting wild-type eggshells)  
99 and the WE strain were used ( $n = 6$  for both). To obtain mucosal tissues from the isthmuses and  
100 uteri just before eggshell pigments were secreted, female quails were sacrificed 19–20 h after the  
101 last oviposition. The isthmuses and uteri were isolated from the oviducts and opened with  
102 scissors to have the lumen side up. The tissues were rinsed with phosphate-buffered saline (PBS).  
103 Subsequently, ice-cold PBS containing 40 mM dithiothreitol was used as a buffer. Mucosal  
104 surfaces were scraped from the uteri and isthmuses by rubbing softly with an interdental brush,  
105 and the separated tissues were collected by centrifugation at  $400 \times g$  and 4 °C. Preliminary  
106 histological observation of the uteri and isthmuses, which were treated using this method,  
107 confirmed that the epithelia were mainly separated from the mucosal folds (S2 Fig).

108 For the extraction of total RNA, 50 mg of the tissue pellet was dissolved in 1 mL of TRI  
109 Reagent (Molecular Research Center, Cincinnati, OH, USA), and total RNA was purified using  
110 the RNeasy Mini Kit (Qiagen, Hilden, Germany). RNA quality was assessed using Bioanalyzer  
111 Pico Chips (Agilent Technologies, Santa Clara, CA, USA). RNA samples with integrity numbers  
112 greater than 7.6 were used for constructing libraries. We isolated poly(A)<sup>+</sup> RNA from 1 ng of  
113 total RNA using the NEBNext Poly(A) mRNA Magnetic Isolation Module (NEB, Ipswich, MA,  
114 USA) following the manufacturer's instructions. We converted oligo(dT)-selected RNA into a  
115 cDNA library for mRNA sequencing using the NEBNext Ultra™ Directional RNA Library Prep  
116 Kit for Illumina (NEB) in accordance with the manufacturer's instructions. The library was

117 sequenced on an Illumina HiSeq 1500 platform by paired-end sequencing (100 bp). We trimmed  
118 the adapter sequences from the reads using Trimmomatic software v0.33 [22], and then mapped  
119 the reads to the reference genome (Accession code: GCF\_001577835.1) using TopHat2 v2.1.0  
120 [23]. Read counts per gene and fragments per kilobase of transcript per million mapped reads  
121 (FPKM) were calculated using Cuffdiff v2.2.1 [24] and Cufflinks v2.2.1 [25]. FPKM was then  
122 transformed into transcripts per kilobase million. We obtained mRNA sequencing data from  
123 various organs and tissues of a 15-month-old male quail from the Sequence Read Archive (Bio  
124 Project number: PRJNA296888), and six RNA samples were analyzed for each organ or tissue on  
125 an Illumina HiSeq 2500 platform by paired-end sequencing (100 bp). The count data of these  
126 organs and tissues were generated using the same procedure as that used for the mRNA  
127 sequencing data of the uteri and isthmuses in this study.

128         Before detecting differentially expressed genes (DEGs), we excluded genes from the  
129 dataset whose counts fell below the threshold (1) in any sample. Then, we performed likelihood  
130 ratio tests using the glmLRT function in EdgeR v3.20.9 [26]. In the DEG analysis, a full model  
131 for the count data was compared to the reduced model, in which the object coefficient was set to  
132 0. *P*-values were adjusted for comparison of the expression level between the uterus and each  
133 organ or tissue using the Benjamini–Hochberg method. Genes whose counts were significantly  
134 larger (adjusted  $p < 0.05$ , fold change  $> 2$ ) in the uterus were classified as genes that were  
135 specifically upregulated in the uterus. Hierarchical clustering was performed using the heatmap.2  
136 function in the gplots package of R v.3.4.3, using Ward’s method with the Euclidean distance  
137 metric.

## 138 **Double-digest restriction site-associated DNA (ddRAD) sequencing** 139 **and association test**

140 To construct the reference family for genetic linkage analysis, one male of the WE strain and one  
141 female of the NIES-L strain that exhibited wild-type eggshells were used as parents. The F<sub>2</sub>  
142 hybrids were generated by crossing an F<sub>1</sub> hybrid male with three F<sub>1</sub> hybrid females. Genomic  
143 DNA was extracted from the red blood cells of the parents and 99 F<sub>2</sub> hybrid females using the  
144 DNeasy Blood & Tissue Kit (Qiagen). The library was constructed according to a previously  
145 described method [27]. After digesting 100 ng of DNA from each sample using EcoRI and MseI  
146 (NEB), adapters containing barcode sequences were ligated to the ends of the DNA fragments.  
147 DNA fragments ranging from 300 bp to 500 bp were collected using the Pippin Prep (Sage  
148 Science, Beverly, MA, USA) and purified using AMPure XP beads (Beckman, Brea, CA, USA).  
149 The purified fragments were amplified (six cycles) with PCR primer sets containing index  
150 sequences, using Phusion High-Fidelity DNA polymerase (NEB). Library quality was validated  
151 using a 2100 Bioanalyzer with the Agilent High-Sensitivity DNA Kit (Agilent Technologies).  
152 The library was sequenced on an Illumina HiSeq 1500 platform by paired-end sequencing (100  
153 bp) at the Functional Genomics Facility, National Institute for Basic Biology, Japan.

154 Sequence data were demultiplexed using their barcodes, cleaned by removing reads of  
155 low quality, and trimmed to 95 or 100 bp using Stacks v1.44 [28]. The processed reads were  
156 aligned to the reference sequence using Bowtie 2 v2.2.8 [29]. Single nucleotide polymorphisms  
157 (SNPs) were assigned by aligning paired-end reads to the reference sequence using Stacks. SNPs  
158 with a depth of coverage of less than 8× were counted as missing data. After eliminating SNPs  
159 that deviated from the Hardy–Weinberg equilibrium ( $p < 0.000001$ ) or had call rates of less than  
160 80%, an association test was performed using Fisher’s exact test implemented in PLINK v1.90  
161 [30]. Sequences of the adapters and primers are shown in S1 Data.

## 162 **Whole-genome resequencing**



163 Genomic DNA was extracted from the red blood cells of the parental quails used to produce F<sub>1</sub>  
164 hybrids in genetic linkage analysis, as described above. Library construction and paired-end  
165 sequencing were performed using an Illumina HiSeq X Ten platform (150 bp) at BGI Shenzhen.  
166 After trimming the reads using Trimmomatic, the reads were mapped to the reference sequence  
167 (Accession code: GCF\_001577835.1) using BWA-MEM v0.7.15-r1140 [31]. Subsequently,  
168 variants on chromosome 6 were called using Picard v1.119  
169 (<http://broadinstitute.github.io/picard/>) and the Genome Analysis Toolkit [32] according to a  
170 variant call pipeline (<https://github.com/gencorefacility/variant-calling-pipeline>). We filtered out  
171 bases with low Phred-scaled quality scores (less than 30) and reads with low mapping quality  
172 (less than 30) using the Genome Analysis Toolkit. Genotypes with individual coverage of less  
173 than 10× or more than 70× were filtered out using SnpSift v4.3t [33], and sequence variants that  
174 were found in the candidate region were annotated using SnpEff v4.3t [33]. To narrow down the  
175 candidate region, we searched for candidate genomic intervals for informative SNP markers that  
176 could reveal the parental origins of chromosomal regions of the parent quail. To identify  
177 candidate sequence variants around the candidate genomic region, we extracted sequence variants  
178 that were homozygous in the WE strain and then filtered out those found in the NIES-L strain.  
179 We searched for structural variants around the candidate genomic region using Integrative  
180 Genomics Viewer v2.6.3 [34] and Pindel v0.2.5b9 [35]. Nucleotide sequences were determined  
181 using an ABI PRISM 3130 DNA Analyzer (Applied Biosystems, Foster City, CA, USA) after  
182 cycle-sequencing reactions using the BigDye Terminator v1.1 Cycle Sequencing Kit (Applied  
183 Biosystems). The primer sequences are listed in S1 Table.

## 184 **qPCR analysis**

185 To compare gene expression levels of target genes between wild-type and mutant uteri, qPCR  
186 analysis was performed using RNA samples, which were used for mRNA sequencing ( $n = 5$  for  
187 both the commercial quail and WE strain). qPCR analysis was also performed using RNA  
188 samples extracted from the uterine tissues of female quail that were not used for mRNA  
189 sequencing ( $n = 5$  for both the commercial quail and WE strain). Tissue collection and RNA  
190 extraction for these additional 10 RNA samples were conducted using the same method as that  
191 used for mRNA sequencing; however, quails were maintained under a 16:8 h light/dark  
192 photoperiod, and uterine tissues were collected 17 h after oviposition [36]. Total RNA (500 ng)  
193 was reverse transcribed into cDNA in a 10  $\mu$ L reaction mixture using oligo(dT) and the ReverTra  
194 Ace qPCR RT Master Mix with a gDNA Remover (Toyobo, Osaka, Japan). PCR amplification  
195 (0.1  $\mu$ L cDNA in a 10  $\mu$ L reaction mixture) was performed using the Thunderbird SYBR qPCR  
196 Mix (Toyobo) and the StepOnePlus™ Real-Time PCR System (Applied Biosystems, Carlsbad,  
197 CA, USA). Melt curve analysis was performed immediately after amplification. *ACTB* was used  
198 as an endogenous control. Each experiment was performed in triplicate. For all primer sets, the  
199 amplification efficiency was 92%–112%, and the correlation coefficient was greater than 0.97.  
200 The primer sequences and PCR reaction conditions are listed in S1 Table.

## 201 **Histology**

202 Uteri were collected from female quails ( $n = 6$  for both the commercial quail and WE strain)  
203 19–20 h after oviposition and fixed overnight in Bouin's solution. The fixed tissues were  
204 dehydrated in a series of graded ethanol, immersed in a 1:1 ethanol/xylene solution, and  
205 subsequently embedded in paraffin. The tissues were sectioned at a thickness of 4  $\mu$ m and  
206 mounted onto ovalbumin-coated glass slides. After deparaffinization, the sections were stained  
207 with Mayer's hematoxylin and eosin or left unstained.

## 208 **Transmission electron microscopy**

209 Uterine samples for transmission electron microscopy (TEM) were collected from female quails  
210 ( $n = 1$  for both the commercial quail and WE strain) 19–20 h after oviposition, fixed overnight in  
211 2% glutaraldehyde (in 0.1 M phosphate buffer) at 4 °C, rinsed with 0.1 M phosphate buffer  
212 overnight at 4 °C, and then post-fixed in 2% osmium tetroxide (in deionized water [DW]) for 2 h  
213 at 4 °C. The fixed specimens were dehydrated in a series of graded ethanol (50%, 70%, 90%,  
214 100%, 100%, and 100%) for 15 min at RT, immersed in propylene oxide for 30 min and then in a  
215 propylene oxide and epoxy resin mixture for 2 h at RT, and finally embedded in gelatin capsules  
216 with epoxy resin for two days at 60 °C. Ultrathin sections of 80 nm thickness were cut using an  
217 ultramicrotome with diamond knives and mounted on copper grids with a mesh size of 200  $\mu\text{m}$ .  
218 The sections were stained with 2% uranyl acetate (in DW) for 15 min and lead staining solution  
219 for 5 min at RT. TEM was performed using an H-7600 TEM (Hitachi, Tokyo, Japan) operated at  
220 an accelerating voltage of 100 kV.

## 221 ***In situ* hybridization**

222 Tissues were collected from female quails ( $n = 2$  for both the commercial quail and the WE  
223 strain) at 19–20 h after ovulation, fixed with 4% PFA overnight, and dehydrated sequentially  
224 with 25% MeOH/PBT (PBS, 0.1% Tween 20), 50% MeOH/PBT, 75% MeOH/PBT, and 100%  
225 MeOH for 5 min each. After dehydration, the tissues were immersed in 100% EtOH and 100%  
226 xylene for 1 h each. Subsequently, tissues were embedded in paraffin wax 60 (Sakura, Tokyo,  
227 Japan) and 10  $\mu\text{m}$  sections were prepared using a Leica RM2125 microtome (Leica, Wetzlar,  
228 Germany). Sections were dried on glass slides overnight and then hydrated sequentially with  
229 100% xylene, 100% EtOH, 90% EtOH, 70% EtOH, and PBT for 5 min each. After the hydration  
230 process, the slides were immersed in 1  $\mu\text{g/mL}$  of proteinase K in PBT for 7 min at 37 °C. Slides

231 were washed with PBT three times for 5 min and then fixed with 4% PFA for 20 min. The  
232 sections were hybridized with 1 µg/mL of DIG-labeled RNA in hybridization buffer (50%  
233 formamide, 5× saline-sodium citrate [SSC], 1 mg/mL total RNA, 100 µg/mL heparin, 0.1%  
234 Tween 20, 0.1% 3-[(3-cholamidopropyl)dimethylammonio]-1-propanesulfonate [CHAPS], and  
235 10 mM ethylenediaminetetraacetic acid [EDTA]) overnight at 68 °C. The slides were washed  
236 twice with 50% formamide in 2× SSC for 30 min. After cooling, the slides were incubated with  
237 anti-DIG antibody (1:1000; Roche, Penzberg, Germany) overnight. After the slides were washed  
238 with Tris-buffered saline with 0.1% Tween 20 three times for 5 min, the color was developed in  
239 AP buffer (100 mM Tris-HCl, 100 mM NaCl, 10 mM MgCl<sub>2</sub>, NBT 4.5 µL/mL [Roche], BCIP  
240 3.5 µL/mL [Roche], pH 9.5).

241 For the synthesis of RNA probes, partial sequences of cDNAs of the target genes were  
242 obtained by PCR amplification (see S1 Table for primer sequences and S2 Data for partial  
243 sequences of cDNAs) and then inserted into the pGEM-T Easy Vector System (Promega,  
244 Madison, WI, USA). RNA probes were synthesized *in vitro* using SP6 RNA polymerase and  
245 plasmid DNA digested with SphI (*ALAS1*) and ApaI (*HEPHL1* and *PITX3*).

## 246 **GO term enrichment analysis**

247 Gene Ontology (GO) term enrichment analyses were performed using the overrepresentation test  
248 (released 2021-02-24) of the PANTHER (Protein ANalysis THrough Evolutionary Relationships)  
249 Classification System (annotation version 16.0 released 2020-12-01) [37]. The *Gallus gallus*  
250 database was used as the reference. The PANTHER GO-Slim Biological Process was used as the  
251 annotation dataset. *p*-values of Fisher's exact test were adjusted using the Benjamini–Hochberg  
252 method. GO terms were considered significantly enriched if they had an FDR of < 0.05.

## 253 **Biochemical assay for the PPIX-forming ability of the uterus**

254 Uterine tissues were collected from female quails ( $n = 1$  for both the commercial quail and WE  
255 strain) 15–20 h after oviposition and homogenized in ice-cold PBS containing 0.05% Triton-  
256 X100. After centrifugation at  $20,000 \times g$  and  $4^\circ\text{C}$  for 5 min, the supernatants of each homogenate  
257 were incubated in the presence of 0, 1, or 2 mM 5-aminolevulinic acid (ALA) (Wako, Osaka,  
258 Japan) in 96-well plastic plates at  $39^\circ\text{C}$  for 20 h (three reactions for each concentration of ALA  
259 were performed in 110  $\mu\text{L}$  homogenates). The absorbance was measured at 405 nm using an  
260 ARVOx4 2030 Multilabel Reader (PerkinElmer, Waltham, MA, USA) because PPIX exhibits  
261 maximum light absorbance at 409 nm. Supernatants incubated without ALA supplementation  
262 were used as controls. The total protein concentrations of supernatants were determined using the  
263 Bradford method, and the mean absorbance per 1 mg/mL total protein concentration was  
264 calculated for each sample at each ALA concentration.

## 265 **Statistical analysis**

266 R v.3.4.3 (R Core Team) and MS Excel (Microsoft Corp., Redmond, WA, USA) were used for  
267 statistical analyses. For the comparison of expression levels by qPCR analysis, Welch's two-  
268 tailed  $t$ -test was performed using delta  $C_t$  values. Welch's two-tailed  $t$ -test was also used to test  
269 the differences in absorbance (at 405 nm) of uterine homogenates between the wild-type and  
270 mutant quails. The alpha level of these statistical tests was set at 0.05.

## 271 **Data availability**

272 The Illumina data generated in this study were deposited in the DDBJ Sequence Read Archive:  
273 ddRAD sequencing (Accession codes: DRA005969), mRNA sequencing (DRA006948), and  
274 whole-genome resequencing (DRA007010). All raw data are included in the Supporting

275 Information or deposited on GitHub ([https://github.com/isst001/eggshell\\_color\\_gene](https://github.com/isst001/eggshell_color_gene)). Other  
276 miscellaneous information is available from the corresponding author upon request.

277

## 278 **Results**

### 279 **Histological analysis of the uterine mucosae of wild-type and mutant** 280 **quails**

281 We performed gross and histological examination of the uterine mucosae of wild-type and mutant  
282 quails, which lay eggs with normal and white eggshells, respectively (Fig 1A; S3 Fig). The  
283 uterine mucosa of the wild-type quail exhibited a dark brown color, and that of the mutant quail  
284 was pale brown (Fig 1B). Histological examination revealed that brown pigment granules were  
285 accumulated in the apical cells of the mucosal epithelium of the uterus in the wild-type quail  
286 before anticipated secretion (19–20 h after oviposition), whereas few brown pigment granules  
287 were observed for the mutant quail (Fig 1C, D). Instead, pink-colored, eosinophilic granules  
288 accumulated in the cytoplasm of apical cells in the mutant, suggesting that transport vesicles  
289 containing few or no PPIX are formed even in the mutant cells. Electron microscopic observation  
290 of the uterine mucosa sections also showed that transport vesicles were accumulated in the apical  
291 cells of both the wild type and mutant (S4 Fig).

292

293 **Fig 1. The *white eggshell* phenotype.** (A) Wild-type and mutant white eggs. (B) Wild-type and  
294 mutant uteri were opened so that the lumen side could be seen. (C) Schematic diagram of the  
295 uterine mucosa. Epithelium of the uterine mucosa consists of apical cells and basal cells, which  
296 are alternatingly arranged. Pigment granules containing PPIX molecules accumulate in the

297 luminal side of the cytoplasm of apical cells before the secretion. The lamina propria is located at  
298 the inner side of the uterine mucosa. (D) Sections of uterine mucosae obtained from wild-type  
299 and mutant quail just before pigment secretion (left and middle panels, HE staining; right panels,  
300 no staining). Ep and LP indicate epithelium and lamina propria, respectively. Brown pigments  
301 accumulated in the epithelium of the uterine mucosa of the wild-type quail, but not in that of the  
302 mutant quail (left panels). Higher-magnification images of mucosal folds (middle panels) indicate  
303 that brown pigment granules accumulated in the wild-type apical cells, but not in the mutant  
304 apical cells (black arrowheads); however, pink-colored, eosinophilic granules accumulated in the  
305 luminal side of the mutant apical cells. Eosinophilic granules also accumulated more centrally in  
306 both wild-type and mutant apical cells (white arrowheads). Sections without staining clearly  
307 demonstrate that brown pigments were accumulated in the luminal side of the apical cells  
308 (arrows) of the wild type, but not in those of the mutant. Scale bars: 1 cm in (A, B); 100  $\mu$ m in  
309 (D).

310

## 311 **Characterization of the mutant uterus by gene expression analysis**

312 We performed mRNA sequencing analysis using the uterine tissues of wild-type and mutant quail.  
313 The average number of mapped read pairs is shown in S1 Data. Comparison of gene expression  
314 between the wild type and mutant showed that 261 out of approximately 17,000 expressed genes  
315 were differentially expressed (adjusted  $p < 0.05$ , fold change  $< 0.5$  or  $> 2$ ) (Fig 2A; S3 Data).  
316 These DEGs consisted of 148 and 113 genes that showed upregulated and downregulated  
317 expression, respectively, in the mutant (Fig 2A; S3 Data). We then focused on changes in the  
318 expression levels of genes that are known to be involved in heme and iron metabolism [11] (S2  
319 Table). Therefore, *5-aminolevulinic acid synthase 1 (ALAS1)* [38], *hephaestin-like 1 (HEPHLI)*

320 [39], and *transferrin receptor protein 1 (TFRC)* [40] were downregulated in the mutant uterus  
321 (Fig 2A; S2 Table). The expression levels of these genes in the mutant decreased to 20%  
322 (*ALAS1*), 0.1% (*HEPHLI*), and 41% (*TFRC*) of those in the wild type (S2 Table). To identify  
323 genes that are specifically upregulated in the uterus, we compared gene expression between the  
324 uterus and the other six organs and two tissues. The results showed that 382 genes were  
325 specifically upregulated in the uterus (Fig 2B; S4 Data). Eleven of the DEGs, including *ALAS1*  
326 and *HEPHLI*, were also included in the uterus-specific upregulated genes (Fig 2C, S3 and S4  
327 Data). The expression levels of *ALAS1* and *HEPHLI* were 4–22 times and 171–1205 times  
328 higher, respectively, in the uterus than those in other organs and tissues (Fig 2D, E; S3 Table).  
329 The results of GO term enrichment analyses of the uterus-specific upregulated genes are shown  
330 in S4 Table. It is of interest to note that many uterus-specific upregulated genes were related to  
331 GO “biological process” (GO:BP) terms, such as cellular ion homeostasis and ion transmembrane  
332 transport. This may be related to eggshell calcification in the uterus. Significant downregulation  
333 of *ALAS1* and *HEPHLI* in the mutant uterus was confirmed by qPCR analysis (Welch’s two-  
334 sided *t*-test,  $p < 0.01$ ) (S5 Fig; S5 Data).

335  
336 **Fig 2. Genes that are specifically upregulated in the wild-type uterus and downregulated in**  
337 **the mutant uterus.** (A) Visualization of the result of differential gene expression analysis using  
338 wild-type and mutant uterine tissues. Dots indicate the expression levels of genes. Differentially  
339 expressed genes (DEGs) [adjusted  $p < 0.05$ , fold change ( $\log_2$  scale)  $> 1$  or  $< -1$ ] are highlighted.  
340 Genes that were downregulated in the mutant and specifically upregulated in the wild type and  
341 *TFRC* are labeled. (B) Gene expression levels of the 382 genes whose expression levels were  
342 higher in the uterus than in other six organs and two tissues, visualized by log-transformed



343 transcripts per kilobase million (TPM) values. (C) The number of downregulated genes in the  
344 mutant uterus, uterus-specific upregulated genes in the wild type, and genes showing both  
345 expression patterns. (D, E) Comparison of expression levels of *ALAS1* (D) and *HEPHL1* (E) in  
346 the wild-type uterus with those in other wild-type organs and tissues and the mutant uterus, using  
347 mRNA sequencing data. Each bar indicates the relative value of the expression level of the gene  
348 in the wild-type uterus when the expression level in each organ or tissue and the mutant uterus is  
349 defined as 1. Values in (D, E) are not indicated by log scale.

350

## 351 **Genetic linkage mapping of the candidate genomic region**

### 352 **responsible for the white eggshell phenotype**

353 The white eggshell phenotype of the mutant quail is inherited in an autosomal recessive manner  
354 [14]. However, the causative mutation, which we refer to as *white eggshell* (*we*), remains  
355 unknown. We performed chromosomal mapping of the mutation by genetic linkage analysis  
356 using 99 F<sub>2</sub> progeny obtained by mating three pairs of F<sub>1</sub> progeny derived from crossing one  
357 mutant male (the WE strain) with one wild-type female (the NIES-L strain). SNP markers were  
358 obtained by ddRAD sequencing of the genomic DNA of the 99 F<sub>2</sub> progeny and their parents. The  
359 average number of aligned read pairs and phenotype data are shown in S1 Data. An association  
360 test using a total of 15,200 SNP markers revealed a significant association of 235 SNP markers  
361 on chromosome 6 (Fisher's exact test, adjusted  $p < 0.01$ ) with the white eggshell phenotype (Fig  
362 3A; S6 Data). The marker SNP201288 displayed the highest association (Fig 3A) and logarithm  
363 of the odds (LOD) score and the lowest recombination frequency (Fig 3B, C; S6 Data); its  
364 genotypes in the F<sub>2</sub> progeny were fully concordant with the eggshell color phenotype (Fig 3D).  
365 Two SNP markers, SNP201255 (which was located adjacent to SNP201288) and SNP202246,

366 were separated by a large genomic interval (2,230 kb) (Fig 3E). SNP202246 was located far  
367 (2,179 kb) from SNP201288 and displayed discordance between genotypes and phenotypes in  
368 eight F<sub>2</sub> progeny (Fig 3D).

369

370 **Fig 3. The candidate genomic region of the *white eggshell (we)* phenotype is mapped to**  
371 **chromosome 6.** (A) Association test using 15,200 single nucleotide polymorphisms (SNPs)  
372 markers. *x*-axis, genomic coordinates of SNPs; *y*-axis, negative logarithm of *p*-values from  
373 Fisher's exact test. Blue line indicates the Bonferroni-corrected *p*-value of 0.01. SNP201288  
374 displayed the strongest association with the phenotype. (B) Logarithm of the odds (LOD) scores  
375 between the *we* locus and all SNP markers on chromosome 6. SNP201288 and flanking SNPs  
376 (SNP201255 and SNP202246) display high LOD scores. (C) LOD scores and recombination  
377 frequencies of three SNPs near the *we* locus. (D) Genotypes of SNPs near the *we* locus in 99 F<sub>2</sub>  
378 individuals. SNP201288 shows a complete concordance between genotypes and eggshell colors  
379 in F<sub>2</sub> progeny. Discordance between genotype and eggshell color was observed for SNP201255 in  
380 F<sub>2</sub> individual #3398 and for SNP202246 in eight F<sub>2</sub> progeny shown by brackets, including F<sub>2</sub>  
381 individual #4040. (E) Genetic and physical maps of SNP markers around the *we* locus. Genetic  
382 distances between the *we* locus and flanking markers are indicated by parentheses. Positions of  
383 SNP202482 and SNP202389 are inverted between the genetic and physical maps, which is  
384 possibly due to an assembly error in the draft genome. (F) Genotypes of Chr6-we1 and Chr-we2  
385 are concordant and discordant, respectively, with the eggshell color, in F<sub>2</sub> individual #4040.  
386 Recombination in the interval between SNP markers is indicated by "×."

387

388 We then carried out whole-genome resequencing of the parental quail, which was used for  
389 genetic linkage analysis, to obtain sequence variant information on chromosome 6. Sequence data

390 of 33 and 45 GB were obtained for the father (WE strain) and mother quail (NIES-L strain),  
391 respectively (S1 Data). The average depth of coverage of chromosome 6 was approximately 16  
392 and 23 for the father and mother quails, respectively (S1 Data). Structural variants, including  
393 copy number variation, large deletions or insertions, and inversions, could not be found around  
394 the candidate genomic region. Almost all informative SNP markers were detected in the vicinity  
395 of SNP201288 and SNP202246 (S7 Data). Among them, the genotypes of Chr6-we1 and Chr6-  
396 we2 were concordant and discordant, respectively, with the eggshell color phenotype of the F<sub>2</sub>  
397 progeny (#4040) (Figs 3E, 4A; S6 Fig; S5 Table). Furthermore, Chr6-we-a, which was detected  
398 in a 2,030 kb genomic region between Chr6-we1 and Chr6-we2, displayed a concordance  
399 between the genotypes and phenotypes of the eight F<sub>2</sub> progeny (S6 Fig; S5 Table). However, the  
400 genotype of chr6-we-a in the mutant was also observed in the quail strain NIES-Fr, which  
401 exhibited wild-type eggshells (S5 Table). Therefore, we eliminated the 2,058 kb region between  
402 Chr6-we1 and SNP202246 from the 2,230 kb candidate region. By searching sequence variants  
403 (SNPs and insertion–deletion mutations [indels]) that are homozygous in the father quail (mutant)  
404 but not found in the mother quail (wild type), 957 candidate sequence variants were detected in  
405 the remaining 172 kb region between SNP201255 and Chr6-we1 (Fig 4A, B; Table S6; S7 Data).

406

407 **Fig 4. Candidate sequence variants and expression analysis of genes around the 172 kb**

408 **candidate region.** (A) Number of sequence variants that were homozygous in the father quail  
409 (WE strain) but not in the mother quail (NIES-L strain) around the *we* locus. White arrowheads  
410 indicate the locations of single nucleotide polymorphism (SNP) markers. (B) The frequencies of  
411 SNPs and insertion–deletion mutations (indels) within the 172 kb candidate region. (C) Eight  
412 genes and a part of *PITX3* that are harbored in the 172 kb candidate region (green arrows). (D)

413 Relative expression levels of 15 genes (located around the candidate genomic region) in the  
414 mutant uteri against those in wild-type uteri. NA denotes genes whose expression was not  
415 detected in the wild-type uterus. Expression levels of six genes (enclosed in squares) substantially  
416 decreased in the mutant (less than 60%–70% of those in the wild type). (E) The graphs show the  
417 results of qPCR analysis of *PITX3* using RNA samples ( $n = 5$  for both wild-type and mutant  
418 quail) that were not used for mRNA sequencing. The expression level in the wild-type uterus is  
419 shown as a relative value against that in the mutant uterus defined as 1. The expression level in  
420 each sample is shown by a circle. Double asterisks denote  $p < 0.01$ .

421  
422 The 172 kb candidate region harbored seven protein-coding genes (*PITX3*, *GBF1*,  
423 *TMEM150A*, *NFKB2*, *PSD*, *FBXL15*, and *CUEDC2*) and two non-coding genes (*LOC107315847*  
424 and *LOC107315848*) (Fig 4C). Six missense variants were included in the 957 sequence variants  
425 (S6 Table; sheet 5 in S7 Data); however, none were predicted to have adverse effects on the  
426 functions of the protein-coding genes, including *GBF1*, *NFKB2*, *PSD*, and *CUEDC2* (S7 Table).  
427 Furthermore, although it is difficult to precisely estimate the effect of sequence variants, the  
428 remaining sequence variants were not considered to be related to functions (sheet 6 in S7 Data).  
429 These results raised the possibility that the mutation affects the expression level of the gene,  
430 rather than its function. We predicted that the recessive *wc* mutation suppresses the expression of  
431 the responsible gene, because mutations that enhance gene expression levels are most likely to be  
432 dominant and not recessive. Therefore, using mRNA sequencing data, we searched for genes on  
433 chromosome 6 that were downregulated in the mutant uteri. Two genes, *PRKG1* and *C6H10orf71*,  
434 were significantly downregulated in the mutant (adjusted  $p < 0.05$ , fold change  $< 1/2$ ) (S8 Table;  
435 sheets 3 and 4 in S3 Data). However, they do not seem to be causative genes because both are  
436 located far ( $> \sim 1$  Mb) from the candidate region. Thus, we focused on the genes located within the

437 candidate region and in the region up to 100 kb on either side (nucleotide positions 14.23–14.61  
438 Mb), of which six genes (*PIK3AP1*, *LOC107315928* [2-hydroxyacylsphingosine 1-beta-  
439 galactosyltransferase-like], *PITX3*, *TMEM150A*, *PSD*, and *CUEDC2*), were substantially  
440 downregulated in the mutant (their expression was less than approximately 70% of that in the  
441 wild-type) (Fig 4D). *PITX3* encodes a transcription factor involved in the normal development,  
442 differentiation, and maintenance of cells in other tissues [41–44]. The other five genes encode  
443 proteins that may function in molecular and cellular processes other than transcriptional  
444 regulation, such as galactosylceramide biosynthesis and signal transduction [45–49]. Because  
445 *PITX3* is likely involved in a tissue-specific transcriptional regulation process, we expected that  
446 this gene could be a strong candidate. qPCR analysis using mRNA samples that were used for  
447 mRNA sequencing also showed non-significant but substantial downregulation of *PITX3* in the  
448 mutant uterus (S7 Fig; S5 Data). We observed significant downregulation of *PITX3* in the mutant  
449 uterus by qPCR analysis using additional RNA samples (Welch’s two-sided *t*-test,  $p < 0.01$ ) (Fig  
450 4E; S5 Data). The difference between the qPCR analyses may be due to the unstable expression  
451 of *PITX3* for some reason. However, these results consistently indicate that *PITX3* is  
452 downregulated in the mutant.

453 Subsequently, we investigated the distribution of the transcripts of *PITX3*, *ALAS1*, and  
454 *HEPHL1* in the uterine mucosa of wild-type and mutant quail. These three genes were expressed  
455 in apical cells of the mucosal epithelium and cells of the lamina propria (LP), the latter of which  
456 are located adjacent to the basal layer of the mucosal epithelium, in the wild type (upper panels of  
457 Fig 5). In contrast, hybridization signals were very weak for all three genes in both the apical  
458 cells and LP cells in the mutant (lower panels of Fig 5). Notably, the hybridization signals of  
459 *ALAS1* were more intense in the LP cells than in the apical cells of the wild-type quail (Fig 5A).

460  
461 **Fig 5 Distribution of *PITX3*, *ALAS1*, and *HEPHLI* transcripts in uterine mucosal tissues.**  
462 (A–C) Light micrographs of sections of mucosal folds of wild-type uterus (upper panels) and  
463 mutant (lower panels) uterus. *PITX*, *ALAS1*, and *HEPHLI* were expressed in the apical cells on  
464 the luminal side of the epithelia (Ep) of the wild type, and their expression was observed as  
465 bluish hybridization signals (upper panels, black arrowheads). Hybridization signals were also  
466 observed in the cells of the lamina propria (LP) (upper panels, white arrowheads). *ALAS1* was  
467 highly expressed in the cells of the LP. The hybridization signals of three genes in the luminal  
468 side of the Ep (lower panels, black arrowheads) and LP cells (lower panels, white arrowheads) of  
469 the mutant were weak compared to those of the wild type.

470  
471 Finally, we examined whether the PPIX-forming ability in uterine homogenates of the  
472 mutant quail could be recovered by supplementation with a large amount of ALA. The results  
473 showed that homogenates from mutant uteri could produce the same amount of PPIX as those  
474 from wild-type uteri in both 1 mM and 2 mM concentrations of ALA (Welch's two-sided *t*-test,  
475  $P \geq 0.05$ ) (Fig 6A; S8 Data), indicating that the restricted availability of ALA or its precursors is  
476 the main cause of the low PPIX production.

477  
478 **Fig 6 Comparison of the protoporphyrin IX (PPIX)-forming ability of uterine homogenates**  
479 **between the wild-type and mutant quail and a hypothetical model of PPIX production in**  
480 **Japanese quail uterus.** (A) Absorbance of uterine homogenates incubated in the presence of  
481 different concentrations of 5-aminolevulinic acid (ALA). Bars indicate the mean absorbance at  
482 405 nm per 1 mg/mL total protein. Dots indicate the absorbance of each sample. Error bars

483 indicate standard error of the mean. (B) Hypothetical model of the uterus-specific regulation of  
484 heme biosynthesis and underlying transcriptional regulation. Transcription factors may enhance  
485 *ALAS1* and *HEPHL1* expression in the uterus. The upregulated expression of *ALAS1* may  
486 enhance ALA synthesis, which may allow uterine cells to synthesize an excessive amount of  
487 PPIX, resulting in the accumulation of PPIX by exceeding the conversion of PPIX to heme. In  
488 addition, *HEPHL1*, a predicted ferroxidase, may suppress the conversion of PPIX to heme by  
489 decreasing the intracellular or intramitochondrial ferrous ions, which may accelerate the  
490 accumulation of PPIX. (C) Schematic diagram of PPIX accumulation in the uterine cells.

491

## 492 **Discussion**

493 Eggshell PPIX is synthesized in the uterus and accumulates in the mucosal epithelium in birds;  
494 however, where and how PPIX is synthesized in the uterus remains largely unknown. In this  
495 study, we investigated the cause of low PPIX production in a Japanese quail mutant that lays  
496 white eggshells by transcriptome and genetic linkage analyses.

497 Transcriptome analysis revealed that the expression levels of 11 genes were higher in the  
498 uterus than those in other organs and tissues in the wild-type quail and were downregulated in the  
499 mutant uterus. Therefore, we expected that these genes would be involved in the uterus-specific  
500 regulation of heme synthesis, which should be disrupted in the mutant quail. Among these 11  
501 genes, *ALAS1* and *HEPHL1*, which are well-known genes related to heme and iron metabolism,  
502 were included. *ALAS1* encodes the rate-limiting enzyme of heme biosynthesis, which catalyzes  
503 ALA synthesis as the first step in heme biosynthesis. Our results indicate that high *ALAS1*  
504 expression in the uterus is required for the increased synthesis of PPIX [38,50]. The PPIX-  
505 forming ability was comparable between the wild-type and mutant uteri in the presence of large

506 amounts of ALA, which suggests that the restricted availability of ALA, owing to the  
507 downregulation of *ALAS1*, is the main cause of low PPIX production in the mutant quail.  
508 However, a previous biochemical study showed that the ability to synthesize PPIX was lower in  
509 mutant homogenates than in wild-type homogenates [15]. The difference in results between this  
510 study and previous studies may be due to the differences in the genetic background of the mutant  
511 and/or wild-type quail used in the experiments. A previous biochemical study using chickens also  
512 suggested that limited availability of ALA or its precursor in the uterus could be the cause of  
513 white eggshells [51]. *ALAS1* expression in the uterus was lower in a chicken strain that laid  
514 lighter brown eggshells than in one with darker brown eggshells [52]. These results and our  
515 present data suggest that low ALA synthesis, due to the downregulation of *ALAS1*, may be a  
516 genetic cause of white eggshells in both quail and chickens. However, we cannot exclude the  
517 possibility that there are additional factors that affect PPIX production other than an insufficient  
518 amount of ALA *in vivo*. *HEPHL1* encodes a copper-dependent ferroxidase that converts ferrous  
519 iron to ferric iron [39]. Thus, *HEPHL1* is likely involved in PPIX accumulation by inhibiting the  
520 conversion of PPIX to heme through its ferroxidase activity. Therefore, the downregulation of  
521 *HEPHL1* is another possible cause of low PPIX production in the mutant quail. Although the  
522 remaining nine genes, except for *ALAS1* and *HEPHL1*, have not been shown to be related to  
523 heme and iron metabolism (S3 Table), these genes are also important in elucidating the molecular  
524 basis of PPIX production in the uterus.

525           This study demonstrated that *ALAS1* is highly expressed in the apical cells of the  
526 epithelium and the lamina propria (LP) cells of the uterine mucosa, indicating the possible  
527 involvement of these cells in PPIX synthesis through ALA synthesis. This concurs with the  
528 suggestion that the amount of PPIX produced is too large to be produced only in the apical cells



529 of the uterine mucosa [53]. However, gene expression analysis of each cell type in the uterine  
530 mucosa should be conducted to clarify the role of the LP and apical cells in PPIX production.

531         The candidate locus responsible for white eggshells was localized to a 172 kb region on  
532 chromosome 6, which contains nine genes, by genetic linkage analysis. Although many candidate  
533 mutations were found within this region, there were no sequence variants that could be expected  
534 to influence gene function. Several genes that are located up to 100 kb on either side of this 172  
535 kb region, including *PITX3*, were substantially downregulated in the mutant. Because *PITX3* is  
536 likely involved in a tissue-specific transcriptional regulation process [41–44], it is plausible that  
537 *ALAS1* expression is regulated by *PITX3*. Therefore, the downregulation of *PITX3* is one  
538 possible cause of the low PPIX production in the mutant. Further investigations, such as  
539 identification of the causative mutation and transgenic rescue experiments, are required to verify  
540 this possibility. The causative mutation may affect *PITX3* expression via a change in the histone  
541 modification of enhancer chromatin. Epigenetic approaches, such as chromatin  
542 immunoprecipitation sequencing with anti-H3K27ac antibody [54] or assay for transposase-  
543 accessible chromatin using sequencing (ATAC-seq) [55], to compare active regulatory regions in  
544 uterine cells between the wild type and mutant would be useful for identifying a candidate as the  
545 uterus-specific enhancer of *PITX3*.

546         Based on our findings, we propose a hypothetical model of the uterus-specific regulation  
547 of heme biosynthesis and underlying transcriptional regulation, as shown in Fig 6B and C. Heme  
548 biosynthesis actively progresses with abundant ALA synthesis by the upregulation of *ALAS1*. In  
549 parallel with this, the conversion of PPIX to heme may be inhibited through a ferroxidase  
550 reaction mediated by the predicted ferroxidase HEPHL1. This inhibition of the final step of heme  
551 biosynthesis results in the accumulation of a large amount of PPIX in the uterus. Transcription

552 factors, such as PITX3, may be involved in the transcriptional regulation of these two genes. This  
553 model requires the production of a large amount of glycine and succinyl-CoA, which are  
554 precursors of ALA in uterine cells. However, to verify our hypothesis, the downstream targets of  
555 PITX3 need to be identified.

556 Many quantitative trait loci that control eggshell color in chickens have been reported [5].  
557 In addition, correlations between the depth of brown eggshell color and the expression levels of  
558 the genes involved in heme biosynthesis have been reported in chickens [52]. However, no  
559 causative genes for eggshell brownness/whiteness in chickens have been identified. *SLCO1B3*,  
560 encoding an anion transporter, is the first and only gene that has been identified as a causative  
561 gene for eggshell color variation; the overexpression of this gene due to retrovirus insertion leads  
562 to a blue egg phenotype in chickens [56]. The findings of this study may help to identify the  
563 causative gene of white eggshells, contributing to a deeper understanding of the genetic basis of  
564 eggshell color variation.

565

## 566 **Conclusions**

567 In this study, we postulated that uterus-specific transcriptional regulation plays an important role  
568 in the uterus-specific regulation of the heme biosynthesis pathway and that this specific  
569 transcriptional regulation is disrupted in the white eggshell mutant quail. Based on this  
570 postulation, we performed transcriptome analysis of wild-type and mutant uteri and genetic  
571 linkage mapping of the mutation responsible for white eggshells. The results showed that 11  
572 genes were specifically upregulated in the uterus and downregulated in the mutant uterus. Among  
573 them, *ALAS1* and *HEPFL1* were highly expressed in the apical cells of the mucosal epithelium

574 and LP cells of the wild-type uterus, but downregulated in the mutant. The results from our  
575 biochemical analysis indicated that the insufficiency of ALA was mainly responsible for the low  
576 PPIX production in the mutant. Furthermore, we showed that several genes in the candidate  
577 genomic region, including the gene encoding the transcription factor PITX3, were downregulated  
578 in the mutant uterus. These results collectively suggest that tissue-specific transcriptional  
579 regulation underlies PPIX production in the uterus. Although further investigation is required to  
580 verify our model, our findings would contribute to uncovering the physiological mechanisms of  
581 PPIX production in the bird uterus and the genetic basis of eggshell color variation.

582

## 583 **Acknowledgments**

584 We would like to thank Hisayo Asao and Asaka Akita (NIBB), Kayako Fukuyama (Kyushu  
585 University), Makoto Mizutani, Mikiharu Nakano, and Mitsuo Nunome (Nagoya University) for  
586 their technical assistance. The quail strains used in this study were provided by the National  
587 BioResource Project (NBRP) Chicken/Quail, supported by the Ministry of Education, Culture,  
588 Sports, Science, and Technology (MEXT) and Japan Agency for Medical Research and  
589 Development (AMED), Japan. ddRAD sequencing was carried out under the NIBB Cooperative  
590 Research Program for Next-generation DNA Sequencing (15-833). Computations were  
591 performed on the NIG supercomputer at the National Institute of Genetics.

592

## 593 **References**

- 594 1. Birkhead T. The most perfect thing: Inside. New York, NY: Bloomsbury Publishing; 2016.
- 595 2. Hauber, M. E. The book of eggs: A life-size guide to the eggs of six hundred of the world's  
596 bird species. Chicago, IL: University of Chicago Press; 2014.

- 597 3. Kilner RM. The evolution of egg colour and patterning in birds. *Biolog. Rev.* 2006;81: 383–  
598 406. Doi:10.1017/S1464793106007044
- 599 4. Samiullah S, Roberts JR, Chousalkar K. Eggshell color in brown-egg laying hens — a  
600 review. *Poult Sci.* 2015;94: 2566–2575. Doi:10.3382/ps/pev202
- 601 5. Wilson PB. Recent advances in avian egg science: A review. *Poult Sci.* 2017;96: 3747–3754.  
602 Doi:10.3382/ps/pex187
- 603 6. Wragg D, Mwacharo JM, Alcalde JA, Wang C, Han J-L, Gongora J, et al. Endogenous  
604 retrovirus EAV-HP linked to blue egg phenotype in Mapuche fowl. *PLoS One.* 2013;8:  
605 e71393. Doi:10.1371/journal.pone.0071393
- 606 7. Kennedy GY, Vevers HG. A survey of avian eggshell pigments. *Comp. Biochem. Physiol.*  
607 Part B *Comp. Biochem.* 1976;55: 117–123. Doi:10.1016/0305-0491(76)90183-8
- 608 8. Gorchein A, Lim CK, Cassey P. Extraction and analysis of colourful eggshell pigments using  
609 HPLC and HPLC/electrospray ionization tandem mass spectrometry. *Biomed. Chromatogr.*  
610 2009;23: 602–606. Doi:10.1002/bmc.1158
- 611 9. Wang XT, Zhao CJ, Li JY, Xu GY, Lian LS, Wu CX, et al. Comparison of the total amount  
612 of eggshell pigments in Dongxiang brown-shelled eggs and Dongxiang blue-shelled eggs.  
613 *Poult Sci.* 2009;88: 1735–1739. Doi:10.3382/ps.2008-00434
- 614 10. Heinemann IU, Jahn M, Jahn D. The biochemistry of heme biosynthesis. *Arch. Biochem.*  
615 *Biophys.* 2008;474: 238–251. Doi:10.1016/j.abb.2008.02.015
- 616 11. Sachar M, Anderson KE, Ma X. Protoporphyrin IX: the good, the bad, and the ugly. *J*  
617 *Pharmacol Exp Ther.* 2016;356: 267–275. Doi:10.1124/jpet.115.228130
- 618 12. Poole HK. A microscopic study of uterine eggshell pigment in Japanese quail. *J Hered.*  
619 1967;58: 200–203. Doi:10.1093/oxfordjournals.jhered.a107586

- 620 13. Tamura T, Fujii S. Histological observations on the quail oviduct: On the secretions in the  
621 mucous epithelium of the uterus. J. Fac. Fish. Anim. Husb. Hiroshima Univ. 1966;6: 373–  
622 393. Doi:10.15027/40496
- 623 14. Poole HK. Egg shell pigmentation in Japanese quail: genetic control of the white egg trait. J  
624 Hered. 1964;55: 136–138. Doi:10.1093/oxfordjournals.jhered.a107312
- 625 15. Poole HK. Relative oöporphyrin content and porphyrin forming capacity of wild-type and  
626 white-egg Japanese quail uterine tissue. Proc Soc Exp Biol Med. 1966;122: 596–598.
- 627 16. Takahashi S, Inooka S, Mizuma Y. Selective breeding for high and low antibody responses  
628 to inactivated Newcastle disease virus in Japanese quails. Poult Sci. 1984;63: 595–599.
- 629 17. Mizutani M. The Japanese quail. In: Chang HL, Huang YC, editors. The relationship  
630 between indigenous animals and humans in APEC region. Taiwan: The Chinese Society of  
631 Animal Science; 2003. Pp. 143–163.
- 632 18. Nunome M, Nakano M, Tadano R, Kawahara-Miki R, Kono T, Takahashi S, et al. Genetic  
633 divergence in domestic Japanese quail inferred from mitochondrial DNA D-Loop and  
634 microsatellite markers. PloS One. 2017;12: e0169978. Doi:10.1371/journal.pone.0169978
- 635 19. Woodard AE, Mather FB. The timing of ovulation, movement of the ovum through the  
636 oviduct, pigmentation and shell deposition in Japanese quail (*Coturnix coturnix japonica*).  
637 Poult Sci. 1964;43: 1427–1432. Doi:10.3382/ps.0431427
- 638 20. Poole HK. Spectrophotometric identification of eggshell pigments and timing of superficial  
639 pigment deposition in the Japanese quail. Proc Soc Exp Biol Med. 1965;119: 547–551.  
640 Doi:10.3181/00379727-119-30234
- 641 21. Tanaka K, Imai T, Koga O. Superficial pigmentation of egg shell in Japanese quail, *Coturnix*  
642 *coturnix japonica*. J Poult Sci. 1977;14: 229–231. Doi:10.2141/jpsa.14.229

- 643 22. Bolger AM, Lohse M, Usadel B. Trimmomatic: a flexible trimmer for Illumina sequence  
644 data. *Bioinformatics*. 2014;30: 2114–2120. Doi:10.1093/bioinformatics/btu170
- 645 23. Kim D, Perteu G, Trapnell C, Pimentel H, Kelley R, Salzberg SL. TopHat2: accurate  
646 alignment of transcriptomes in the presence of insertions, deletions and gene fusions.  
647 *Genome Biol*. 2013;14: R36. Doi:10.1186/gb-2013-14-4-r36
- 648 24. Trapnell C, Hendrickson DG, Sauvageau M, Goff L, Rinn JL, Pachter L. Differential  
649 analysis of gene regulation at transcript resolution with RNA-seq. *Nat Biotechnol*. 2013;31:  
650 46–53. Doi:10.1038/nbt.2450
- 651 25. Trapnell C, Williams BA, Perteu G, Mortazavi A, Kwan G, Baren MJ van, et al. Transcript  
652 assembly and quantification by RNA-Seq reveals unannotated transcripts and isoform  
653 switching during cell differentiation. *Nat Biotechnol*. 2010;28: 511–515.  
654 Doi:10.1038/nbt.1621
- 655 26. Robinson MD, McCarthy DJ, Smyth GK. edgeR: a Bioconductor package for differential  
656 expression analysis of digital gene expression data. *Bioinformatics*. 2010;26: 139–140.  
657 Doi:10.1093/bioinformatics/btp616
- 658 27. Peterson BK, Weber JN, Kay EH, Fisher HS, Hoekstra HE. Double digest RADseq: an  
659 inexpensive method for *de novo* SNP discovery and genotyping in model and non-model  
660 species. *PloS One*. 2012;7: e37135. Doi:10.1371/journal.pone.0037135
- 661 28. Catchen J, Hohenlohe PA, Bassham S, Amores A, Cresko WA. Stacks: an analysis tool set  
662 for population genomics. *Mol Ecol*. 2013;22: 3124–3140. Doi:10.1111/mec.12354
- 663 29. Langmead B, Salzberg SL. Fast gapped-read alignment with Bowtie 2. *Nat Methods*.  
664 2012;9: 357–359. Doi:10.1038/nmeth.1923

- 665 30. Purcell S, Neale B, Todd-Brown K, Thomas L, Ferreira MAR, Bender D, et al. PLINK: a  
666 tool set for whole-genome association and population-based linkage analyses. *Am J Hum*  
667 *Genet.* 2007;81: 559–575. Doi:10.1086/519795
- 668 31. Li H, Durbin R. Fast and accurate short read alignment with Burrows-Wheeler transform.  
669 *Bioinformatics.* 2009;25: 1754–1760. Doi:10.1093/bioinformatics/btp324
- 670 32. McKenna A, Hanna M, Banks E, Sivachenko A, Cibulskis K, Kernytsky A, et al. The  
671 *Genome Analysis Toolkit: A MapReduce framework for analyzing next-generation DNA*  
672 *sequencing data.* *Genome Res.* 2010;20: 1297–1303. Doi:10.1101/gr.107524.110
- 673 33. Cingolani P, Platts A, Wang LL, Coon M, Nguyen T, Wang L, et al. A program for  
674 annotating and predicting the effects of single nucleotide polymorphisms, SnpEff. *Fly*  
675 *(Austin).* 2012;6: 80–92. Doi:10.4161/fly.19695
- 676 34. Robinson JT, Thorvaldsdóttir H, Winckler W, Guttman M, Lander ES, Getz G, et al.  
677 *Integrative genomics viewer.* *Nat Biotechnol.* 2011;29: 24–26. doi:10.1038/nbt.1754
- 678 35. Ye K, Schulz MH, Long Q, Apweiler R, Ning Z. Pindel: a pattern growth approach to detect  
679 break points of large deletions and medium sized insertions from paired-end short reads.  
680 *Bioinformatics.* 2009;25: 2865–2871. doi:10.1093/bioinformatics/btp394
- 681 36. Nakao N, Yasuo S, Nishimura A, Yamamura T, Watanabe T, Anraku T, et al. Circadian  
682 clock gene regulation of steroidogenic acute regulatory protein gene expression in  
683 preovulatory ovarian follicles. *Endocrinology.* 2007;148: 3031–3038. Doi:10.1210/en.2007-  
684 0044
- 685 37. Mi H, Muruganujan A, Ebert D, Huang X, Thomas PD. PANTHER version 14: more  
686 genomes, a new PANTHER GO-slim and improvements in enrichment analysis tools.  
687 *Nucleic Acids Res.* 2019;47: D419–D426. Doi:10.1093/nar/gky1038

- 688 38. Hunter GA, Ferreira GC. Molecular enzymology of 5-aminolevulinate synthase, the  
689 gatekeeper of heme biosynthesis. *Biochim Biophys Acta*. 2011;1814: 1467–1473.  
690 Doi:[10.1016/j.bbapap.2010.12.015](https://doi.org/10.1016/j.bbapap.2010.12.015)
- 691 39. Sharma P, Reichert M, Lu Y, Markello TC, Adams DR, Steinbach PJ, et al. Biallelic  
692 *HEPHL1* variants impair ferroxidase activity and cause an abnormal hair phenotype. *PLOS*  
693 *Genetics*. 2019;15: e1008143. Doi:[10.1371/journal.pgen.1008143](https://doi.org/10.1371/journal.pgen.1008143)
- 694 40. Qian ZM, Li H, Sun H, Ho K. Targeted drug delivery via the transferrin receptor-mediated  
695 endocytosis pathway. *Pharmacol Rev*. 2002;54: 561–587. Doi:[10.1124/pr.54.4.561](https://doi.org/10.1124/pr.54.4.561)
- 696 41. Semina EV, Ferrell RE, Mintz-Hittner HA, Bitoun P, Alward WL, Reiter RS, et al. A novel  
697 homeobox gene *PITX3* is mutated in families with autosomal-dominant cataracts and  
698 ASMD. *Nat Genet*. 1998;19: 167–170. Doi:[10.1038/527](https://doi.org/10.1038/527)
- 699 42. Smidt MP, Smits SM, Bouwmeester H, Hamers FPT, van der Linden AJA, Hellemons  
700 AJCGM, et al. Early developmental failure of substantia nigra dopamine neurons in mice  
701 lacking the homeodomain gene *Pitx3*. *Development*. 2004;131: 1145–1155.  
702 Doi:[10.1242/dev.01022](https://doi.org/10.1242/dev.01022)
- 703 43. L'Honoré A, Coulon V, Marcil A, Lebel M, Lafrance-Vanasse J, Gage P, et al. Sequential  
704 expression and redundancy of *Pitx2* and *Pitx3* genes during muscle development. *Dev Biol*.  
705 2007;307: 421–433. Doi:[10.1016/j.ydbio.2007.04.034](https://doi.org/10.1016/j.ydbio.2007.04.034)
- 706 44. L'honoré A, Commère P-H, Ouimette J-F, Montarras D, Drouin J, Buckingham M. Redox  
707 Regulation by *Pitx2* and *Pitx3* is critical for fetal myogenesis. *Developmental Cell*. 2014;29:  
708 392–405. Doi:[10.1016/j.devcel.2014.04.006](https://doi.org/10.1016/j.devcel.2014.04.006)
- 709 45. Basu S, Schultz AM, Basu M, Roseman S. Enzymatic synthesis of galactocerebroside by a  
710 galactosyltransferase from embryonic chicken brain. *J Biol Chem*. 1971;246: 4272–4279.



- 711 46. Chung J, Nakatsu F, Baskin JM, De Camilli P. Plasticity of PI4KIII $\alpha$  interactions at the  
712 plasma membrane. *EMBO Rep.* 2015;16: 312–320. Doi:[10.15252/embr.201439151](https://doi.org/10.15252/embr.201439151)
- 713 47. Perletti L, Talarico D, Trecca D, Ronchetti D, Fracchiolla NS, Maiolo AT, et al.  
714 Identification of a Novel Gene, PSD, Adjacent to NFKB2/lyt-10, Which Contains Sec7 and  
715 Pleckstrin-Homology Domains. *Genomics.* 1997;46: 251–259.  
716 Doi:[10.1006/geno.1997.5022](https://doi.org/10.1006/geno.1997.5022)
- 717 48. Zhang P-J, Zhao J, Li H-Y, Man J-H, He K, Zhou T, et al. CUE domain containing 2  
718 regulates degradation of progesterone receptor by ubiquitin-proteasome. *EMBO J.* 2007;26:  
719 1831–1842. Doi:[10.1038/sj.emboj.7601602](https://doi.org/10.1038/sj.emboj.7601602)
- 720 49. Maruoka M, Suzuki J, Kawata S, Yoshida K, Hirao N, Sato S, et al. Identification of B cell  
721 adaptor for PI3-kinase (BCAP) as an Abl interactor 1-regulated substrate of Abl kinases.  
722 *FEBS Lett.* 2005;579: 2986–2990. Doi:[10.1016/j.febslet.2005.04.052](https://doi.org/10.1016/j.febslet.2005.04.052)
- 723 50. Samiullah S, Roberts J, Wu S-B. Downregulation of ALAS1 by nicarbazin treatment  
724 underlies the reduced synthesis of protoporphyrin IX in shell gland of laying hens. *Sci Rep.*  
725 2017;7: 6253. Doi:[10.1038/s41598-017-06527-y](https://doi.org/10.1038/s41598-017-06527-y)
- 726 51. Polin, D. Formation of porphyrin from delta-aminolevulinic acid by uterine and liver tissue  
727 from laying hens. *Proc. Soc. Exp. Biol. Med.* **94**, 276–279 (1957).
- 728 52. Li G, Chen S, Duan Z, Qu L, Xu G, Yang N. Comparison of protoporphyrin IX content and  
729 related gene expression in the tissues of chickens laying brown-shelled eggs. *Poult Sci.*  
730 2013;92: 3120–3124. Doi:[10.3382/ps.2013-03484](https://doi.org/10.3382/ps.2013-03484)
- 731 53. Baird T, Solomon SE, Tedstone DR. Localisation and characterization of egg shell  
732 porphyrins in several avian species. *Br Poult Sci.* 1975;16: 201–208.  
733 Doi:[10.1080/00071667508416177](https://doi.org/10.1080/00071667508416177)

- 734 54. Creyghton MP, Cheng AW, Welstead GG, Kooistra T, Carey BW, Steine EJ, et al. Histone  
735 H3K27ac separates active from poised enhancers and predicts developmental state. PNAS.  
736 2010;107: 21931–21936. Doi:[10.1073/pnas.1016071107](https://doi.org/10.1073/pnas.1016071107)
- 737 55. Buenrostro JD, Wu B, Chang HY, Greenleaf WJ. ATAC-seq: A Method for Assaying  
738 Chromatin Accessibility Genome-Wide. Curr Protoc Mol Biol. 2015;109: 21.29.1-21.29.9.  
739 doi:[10.1002/0471142727.mb2129s109](https://doi.org/10.1002/0471142727.mb2129s109)
- 740 56. Li Z, Ren T, Li W, Zhou Y, Han R, Li H, et al. Association between the methylation  
741 statuses at CpG sites in the promoter region of the *SLCO1B3*, RNA expression and color  
742 change in blue eggshells in Lushi chickens. Front Genet. 2019;10.  
743 Doi:[10.3389/fgene.2019.00161](https://doi.org/10.3389/fgene.2019.00161)
- 744
- 745

## 746 **Supporting Information captions**

747 **S1 Fig. Schematic diagram of the heme metabolism pathway.** The image in the upper panel  
748 was prepared by modifying the figure from Sachar et al. (2016) [11].

749  
750 **S2 Fig. Mucosae of wild-type uteri after brushing and isthmuses before and after brushing.**

751 (A–D) Mucosae of uteri after brushing. (B, D) Higher-magnification images of the parts shown  
752 inside frames in (A, C). The epithelium was removed from the mucosa (arrows). Arrowheads  
753 indicate remaining epithelia. (E–H) Mucosae of isthmuses before brushing (E, F) and after  
754 brushing (G, H). (F, H) Higher-magnification images of the parts shown inside frames in (E, G).  
755 Bars indicate 100  $\mu\text{m}$ .

756  
757 **S3 Fig. External shapes of quail oviducts.** Schematic diagram of quail oviduct containing an  
758 egg (A). The uteri of the wild-type and mutant quail were dark brown and pale brown,  
759 respectively (B). The vaginas were removed from the oviducts. Scale bars in (B) 1 cm

760  
761 **S4 Fig. Transmission electron microscopy of the uterine mucosal epithelium.** (A, B) Wild-  
762 type uterus (C, D) Mutant uterus The part shown inside the frame in (A) is enlarged in (C).  
763 Nuclei of apical and basal cells are indicated by arrows and arrowheads, respectively. Transport  
764 vesicles are observed as electron-dense granules in the apical cells of both the wild-type and  
765 mutant epithelia (asterisks). Magnifications are 4000 $\times$  in (A), 10000 $\times$  in (B), 1500 $\times$  in (C), and  
766 7000 $\times$  in (D).

767

768 **S5 Fig. Comparison of *ALAS1* and *HEPHLI* expression between wild-type and mutant uteri**

769 **by qPCR.** The graphs show the results of qPCR analysis using RNA samples ( $n = 5$  for both  
770 wild-type and mutant quail) used for mRNA sequencing (A, B) and RNA samples ( $n = 5$  for both  
771 wild-type and mutant quail) that were not used for mRNA sequencing (C, D). The expression  
772 level of the wild-type uterus is shown as a relative value to that of the mutant uterus, defined as 1.  
773 The expression level in each sample is shown as a circle. Double asterisks indicate  $p < 0.01$ .

774

775 **S6 Fig. Genotypes of SNPs located near the candidate region in nine  $F_2$  progeny that**

776 **exhibited discordance between phenotypes and genotypes of SNP201255 or SNP202246.**

777 Genotypes of SNPs 201288, Chr6-we1, and Chr6-we-a were fully concordant with the eggshell  
778 color phenotypes.

779

780 **S7 Fig. Comparison of *PITX3* expression between wild-type and mutant uteri by qPCR.** The

781 graphs show the results of qPCR analysis using RNA samples ( $n = 5$  for both wild-type and  
782 mutant quail) used for mRNA sequencing. The expression level of the wild-type uterus is shown  
783 as a relative value to that of the mutant uterus, defined as 1. The expression level in each sample  
784 is shown as a circle. NS, not significant. Double asterisks indicate  $p < 0.01$ .

785

786 **S1 Table. Nucleotide sequences of primers used for genotyping, quantitative PCR, and the**

787 **cloning of cDNA fragments.**

788 **S2 Table. Fold changes in expression of heme synthesis-related genes in mutant uteri**

789 **compared to that in wild-type uteri.**

790 **S3 Table. Functions and relative expression levels [ $\log_2$  (fold change)] of 11 genes, which**

791 **were expressed at higher levels in the wild-type uterus than in other organs and tissues and**

792 **were downregulated in the mutant uterus. The expression level of genes in each organ or**  
793 **tissue was defined as 1.**

794 **S4 Table. Gene Ontology (GO) “biological process” (GO:BP) terms overrepresented in 382**  
795 **genes that were specifically upregulated in the uterus.**

796 **S5 Table. Nucleotide positions and genotypes of the three informative single nucleotide**  
797 **polymorphism (SNP) markers.**

798 **S6 Table. Categories of sequence variants in the 172 kb candidate region.**

799 **S7 Table. Putative effects of missense variants of genes located in the 172 kb candidate**  
800 **region.**

801 **S8 Table. Fold changes of differentially expressed genes (DEGs) on chromosome 6.**

802

803 **S1 Data. Statistics of mRNA sequencing, ddRAD sequencing, and whole-genome**  
804 **resequencing; information on DNA samples for genetic linkage analysis; and nucleotide**  
805 **sequences of adaptors and primers for the construction of ddRAD sequencing libraries.**

806 **S2 Data. Sequence of cDNAs used for *in situ* hybridization.**

807 **S3 Data. Raw count data used in the comparison of gene expression between wild-type and**  
808 **mutant uteri and the result of differential gene expression analysis.**

809 **S4 Data. Raw count data used in the comparison of gene expression between uteri and other**  
810 **organs or tissues and the result of differential gene expression analysis.**

811 **S5 Data. Results from qPCR analysis of *ALAS1*, *HEPHL1*, and *PITX3*.**

812 **S6 Data. Results from the genome-wide association test and LOD scores and recombination**  
813 **frequencies of single nucleotide polymorphisms (SNPs) on chromosome 6.**

814 **S7 Data. Sequence variants around the candidate region and annotation of candidate**  
815 **sequence variants within the candidate region.**

816 **S8 Data. Results from biochemical analysis.**

817

## 818 **Author contributions**

819 Conceptualization, S.Ishishita, K.K., Y.M., S.S., Y.G., K.Y., and S.T.; Formal Analysis,

820 S.Ishishita, M.T., and S.K.; Funding acquisition, Y.M.; Investigation, S.Ishishita, M.T., S.K.,

821 S.Iwasaki, S.T., K.Y., I.H., Y.Ohmori, T.S., and A.H.; Methodology, S.Ishishita and S.K.; Project

822 administration; S.Ishishita; Resources, K.K., T.S., Y.M., S.S., Y.G., and Y.Ohkawa; Software,

823 S.Ishishita, S.T., A.H., and K.Y.; Supervision, Y.M. and T.S.; Validation, S.Ishishita, S.T., K.Y.,

824 S.S., and Y.G.; Visualization, S.Ishishita., M.T., S.K., Y.K.; Writing – original draft, S.Ishishita;

825 Writing – review & editing, S.Ishishita, T.S., and Y.M.

826

827

828

**A**

Wild type

Mutant

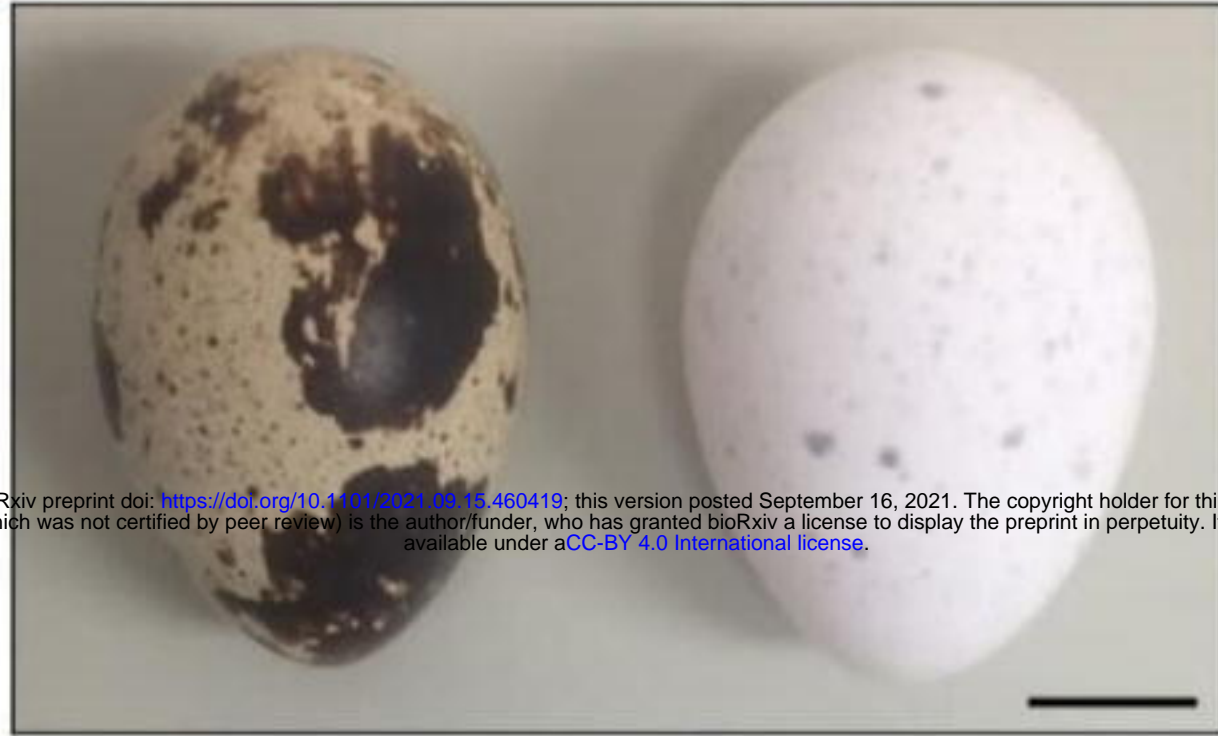

bioRxiv preprint doi: <https://doi.org/10.1101/2021.09.15.460419>; this version posted September 16, 2021. The copyright holder for this preprint (which was not certified by peer review) is the author/funder, who has granted bioRxiv a license to display the preprint in perpetuity. It is made available under aCC-BY 4.0 International license.

**B**

Wild type

Mutant

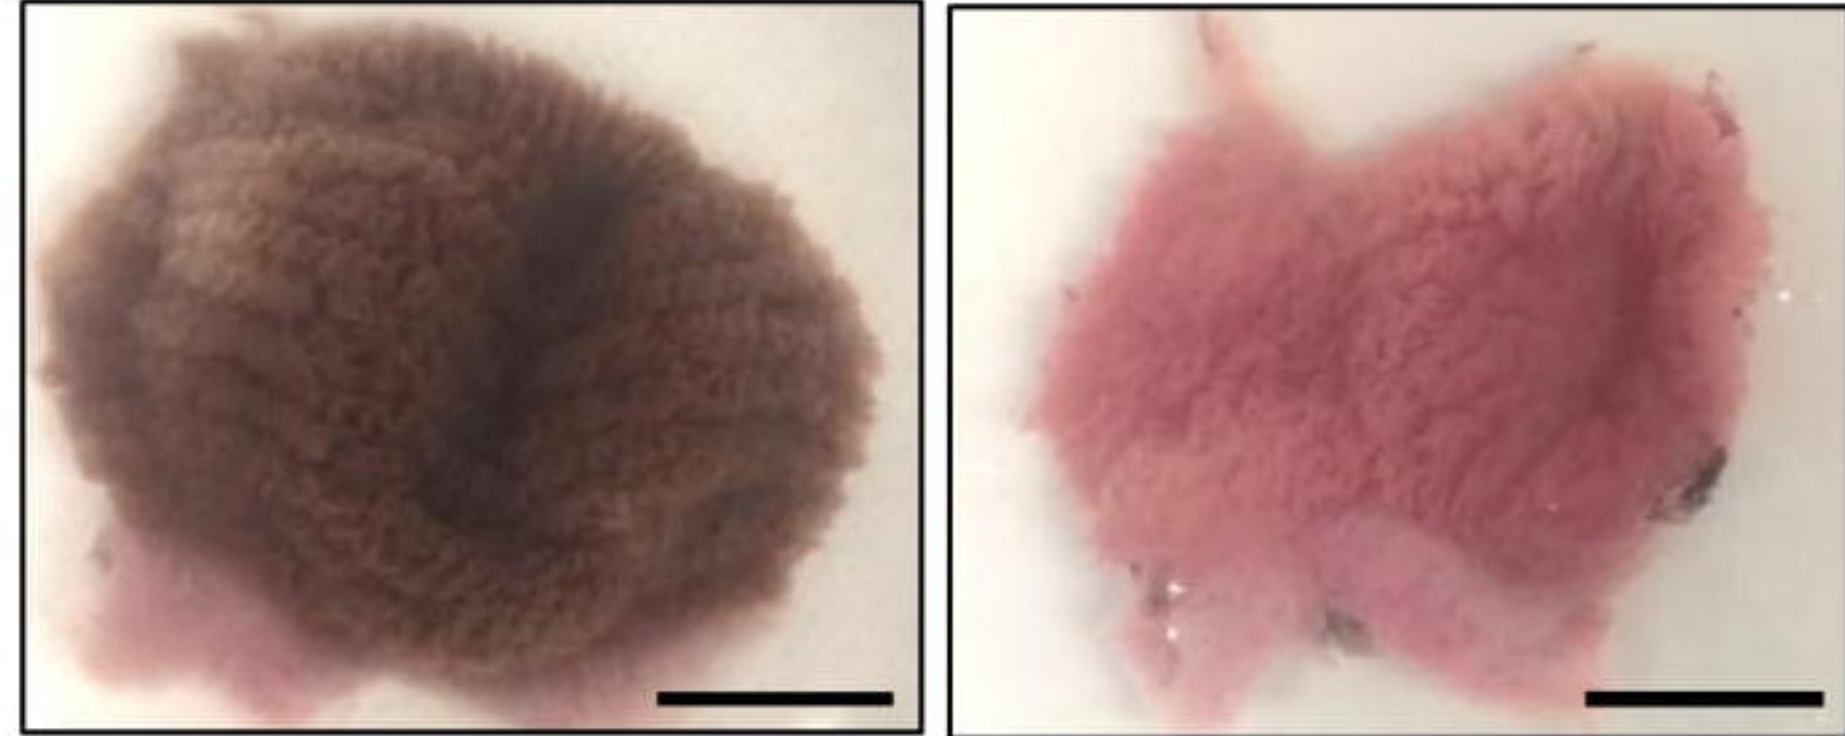**C**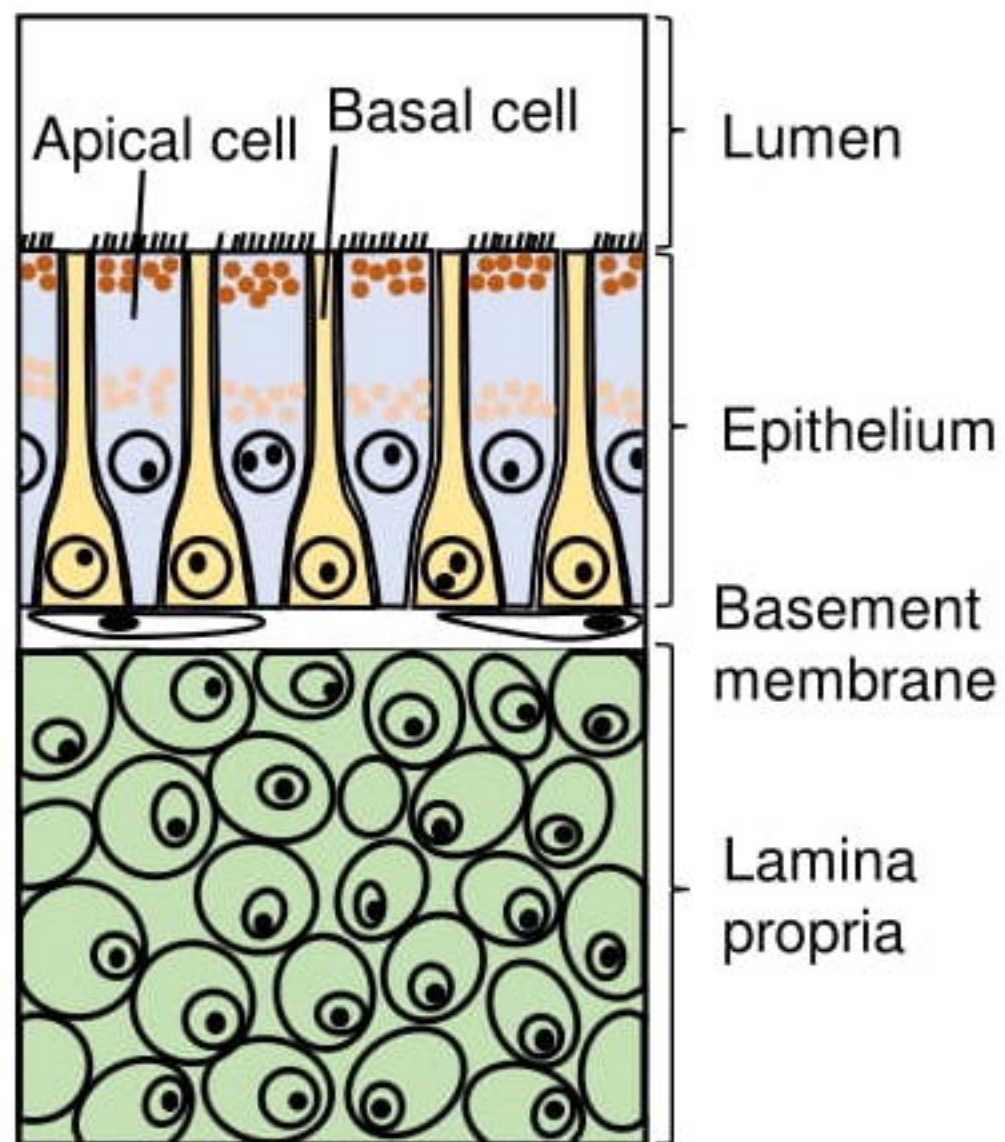**D**

Wild type

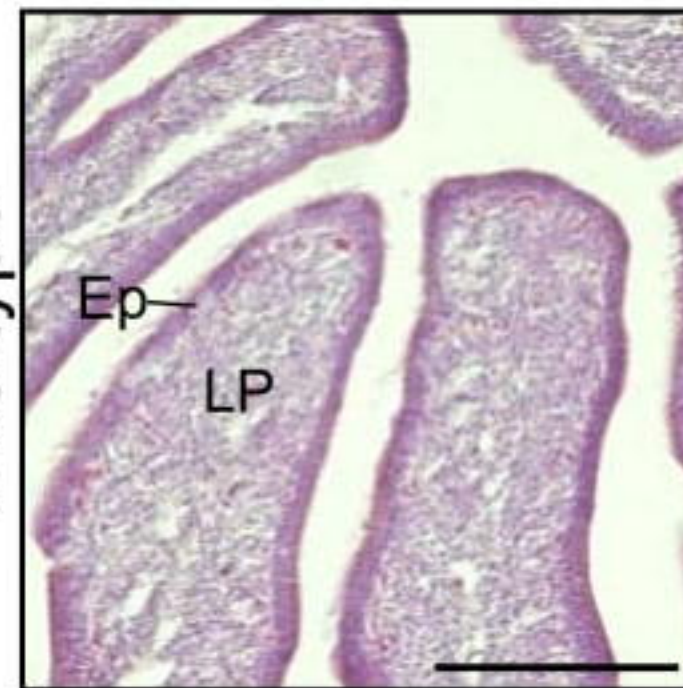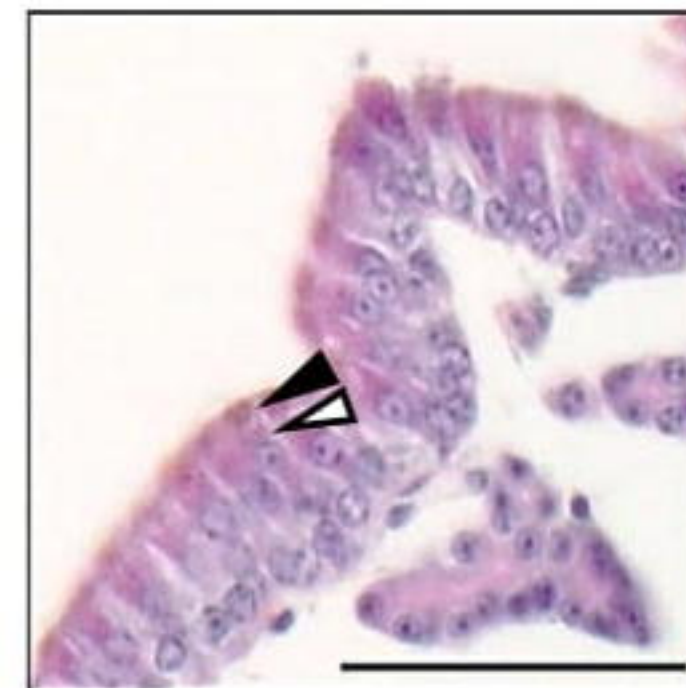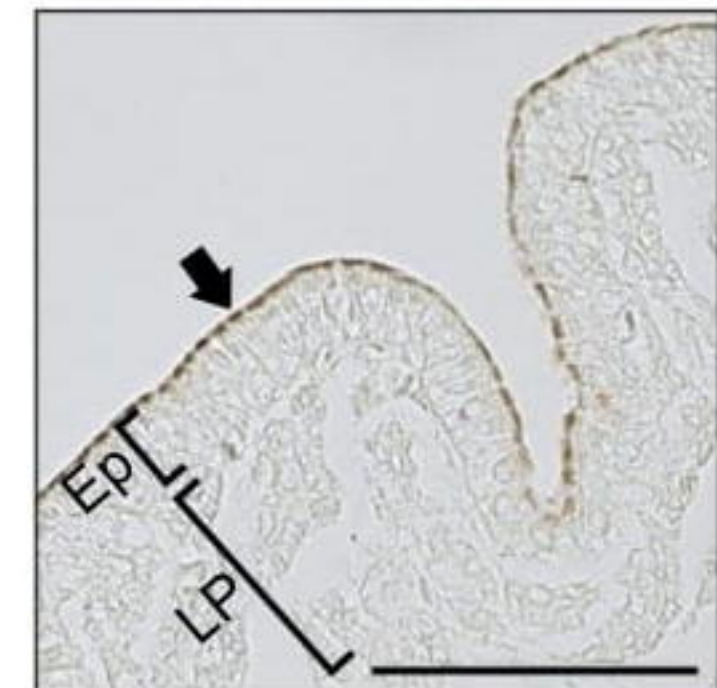

Mutant

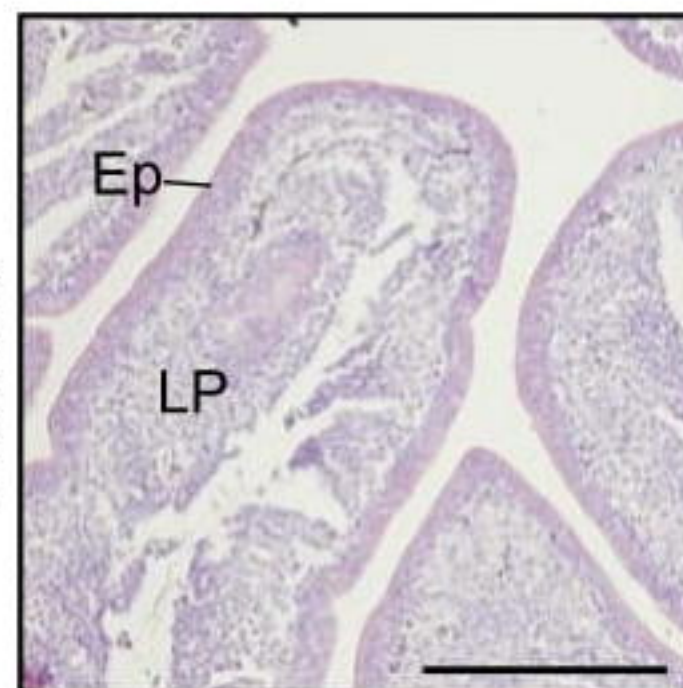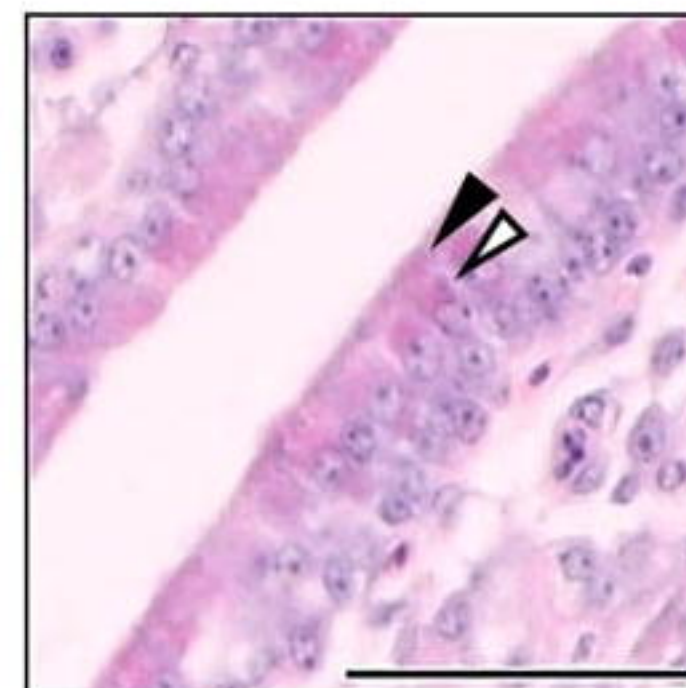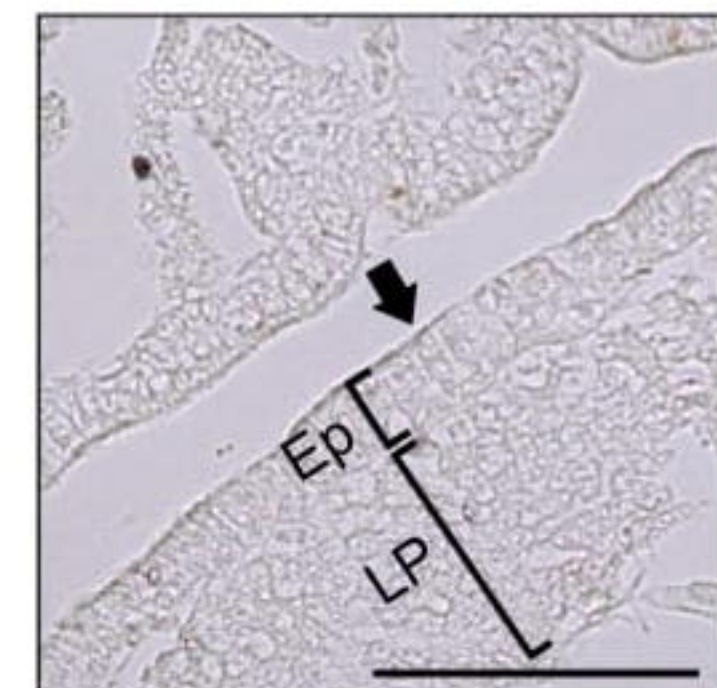

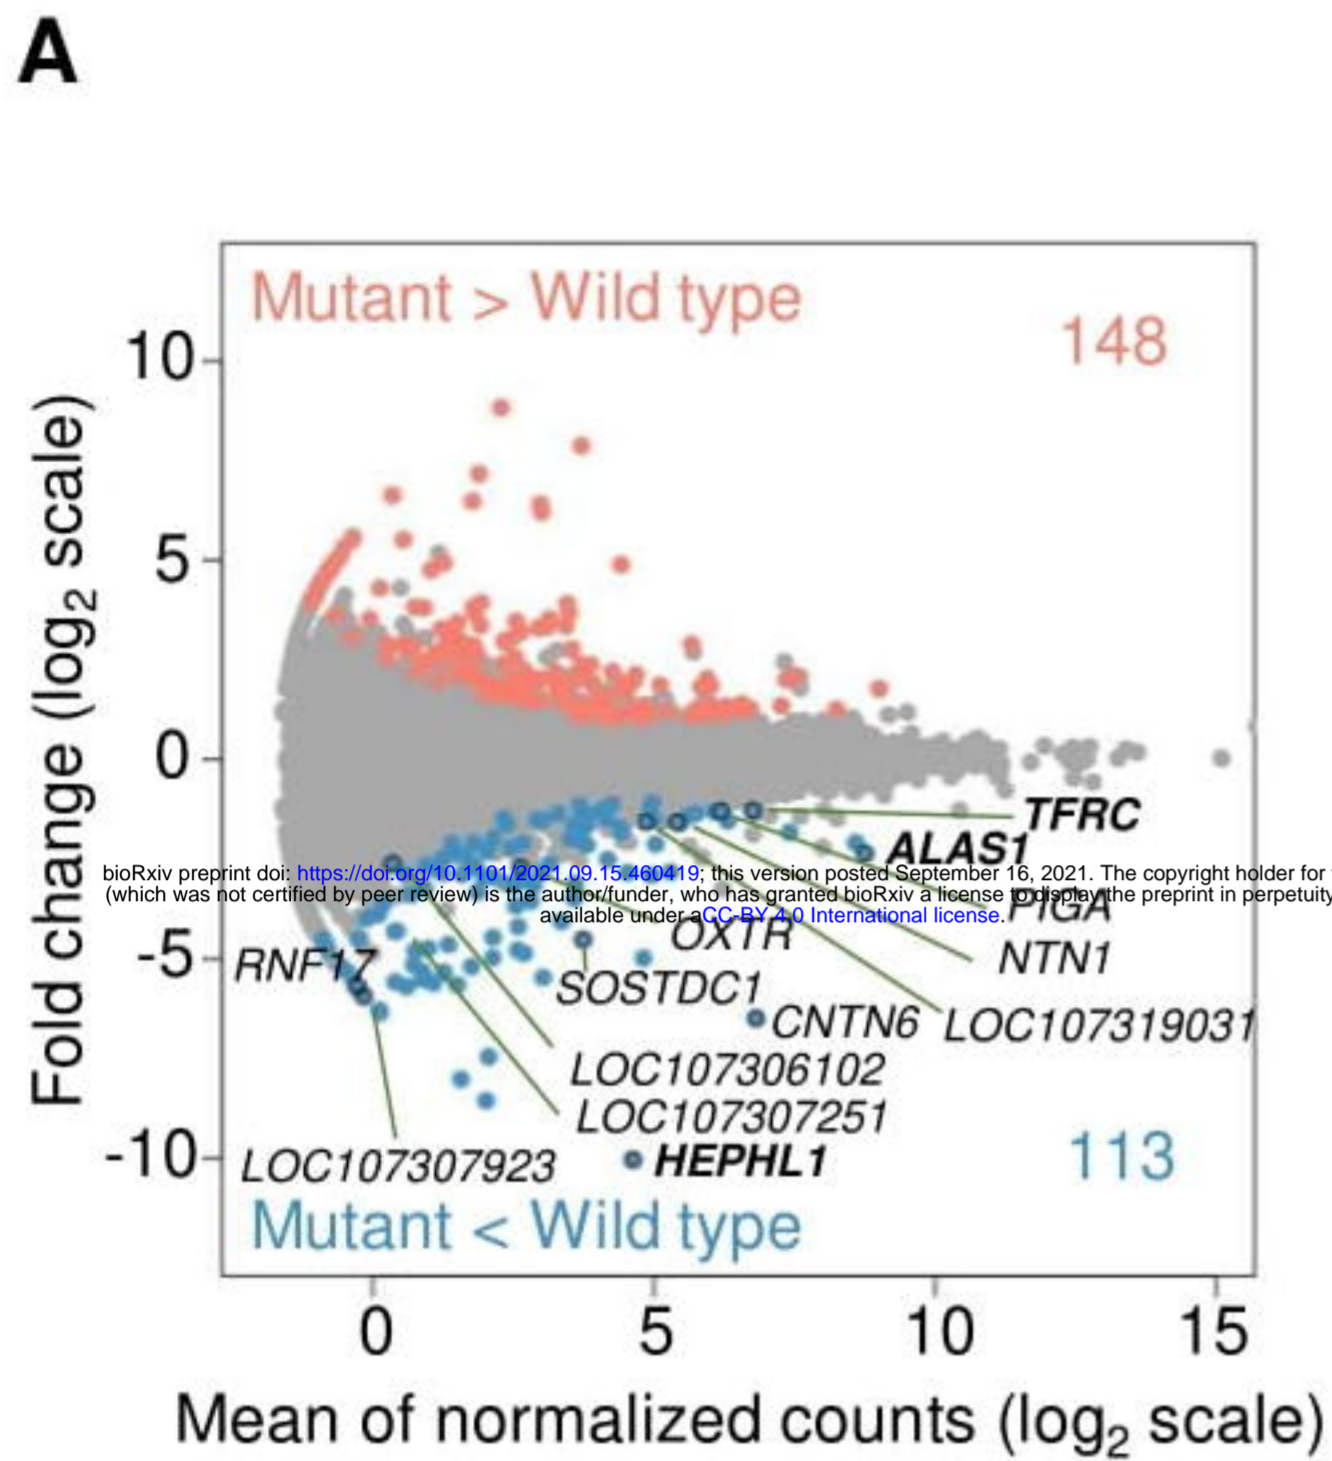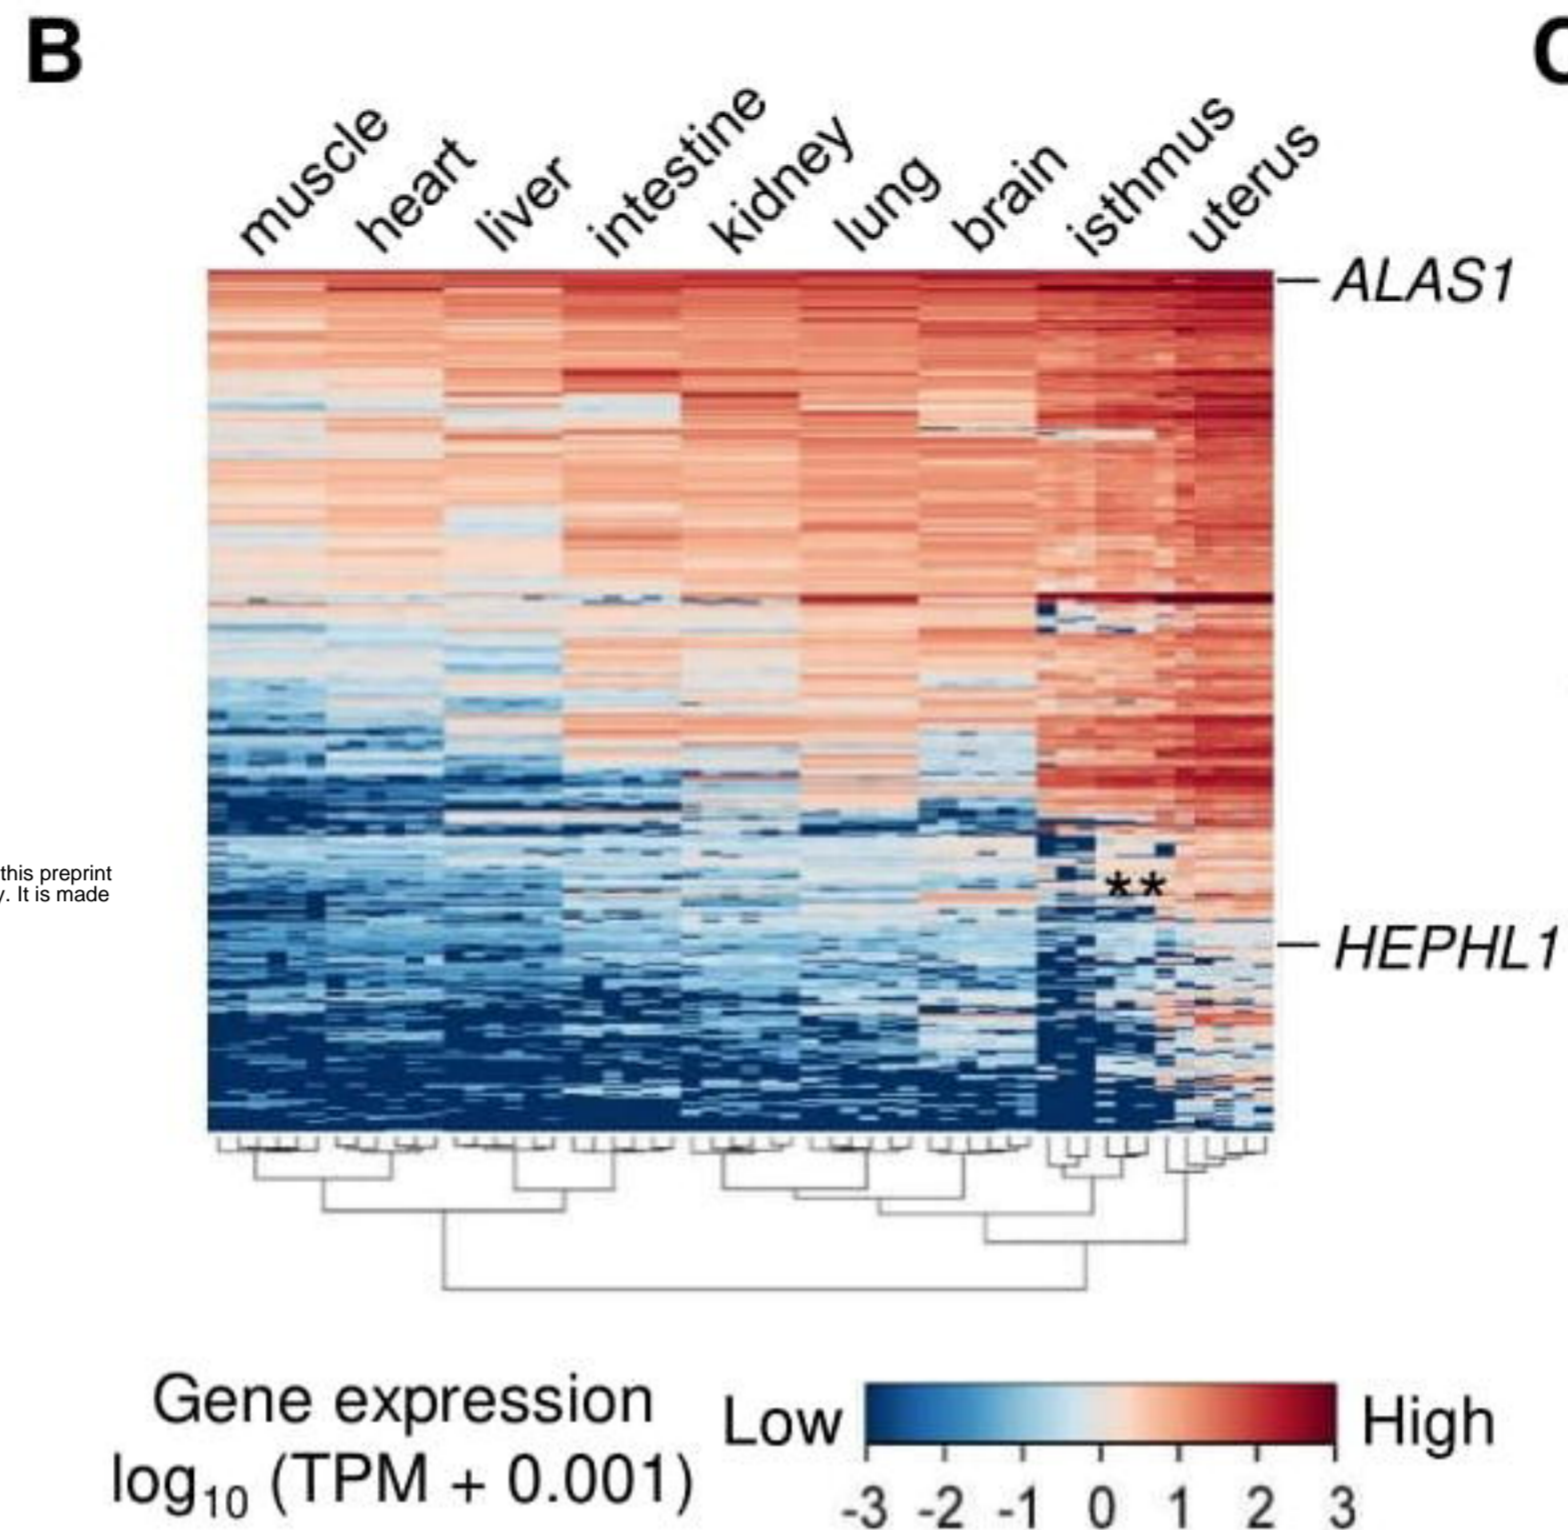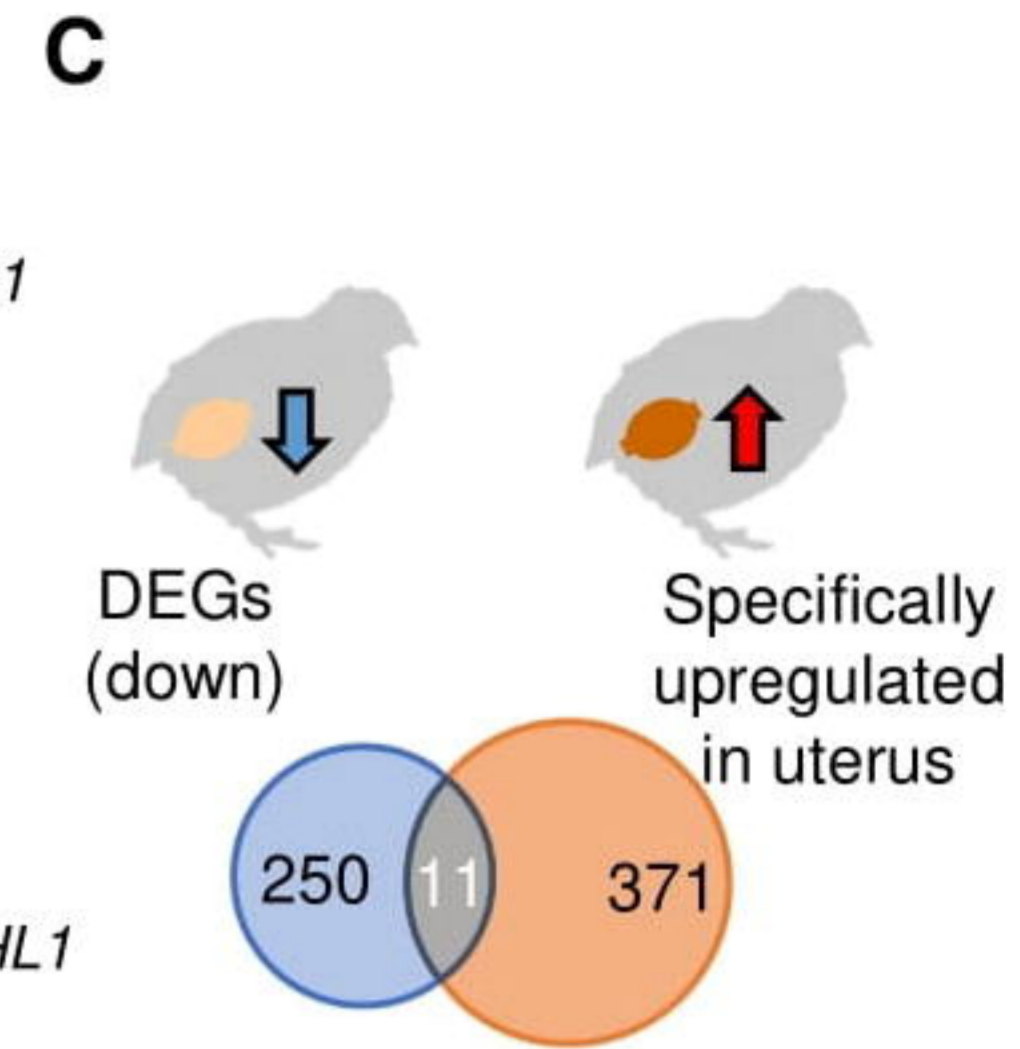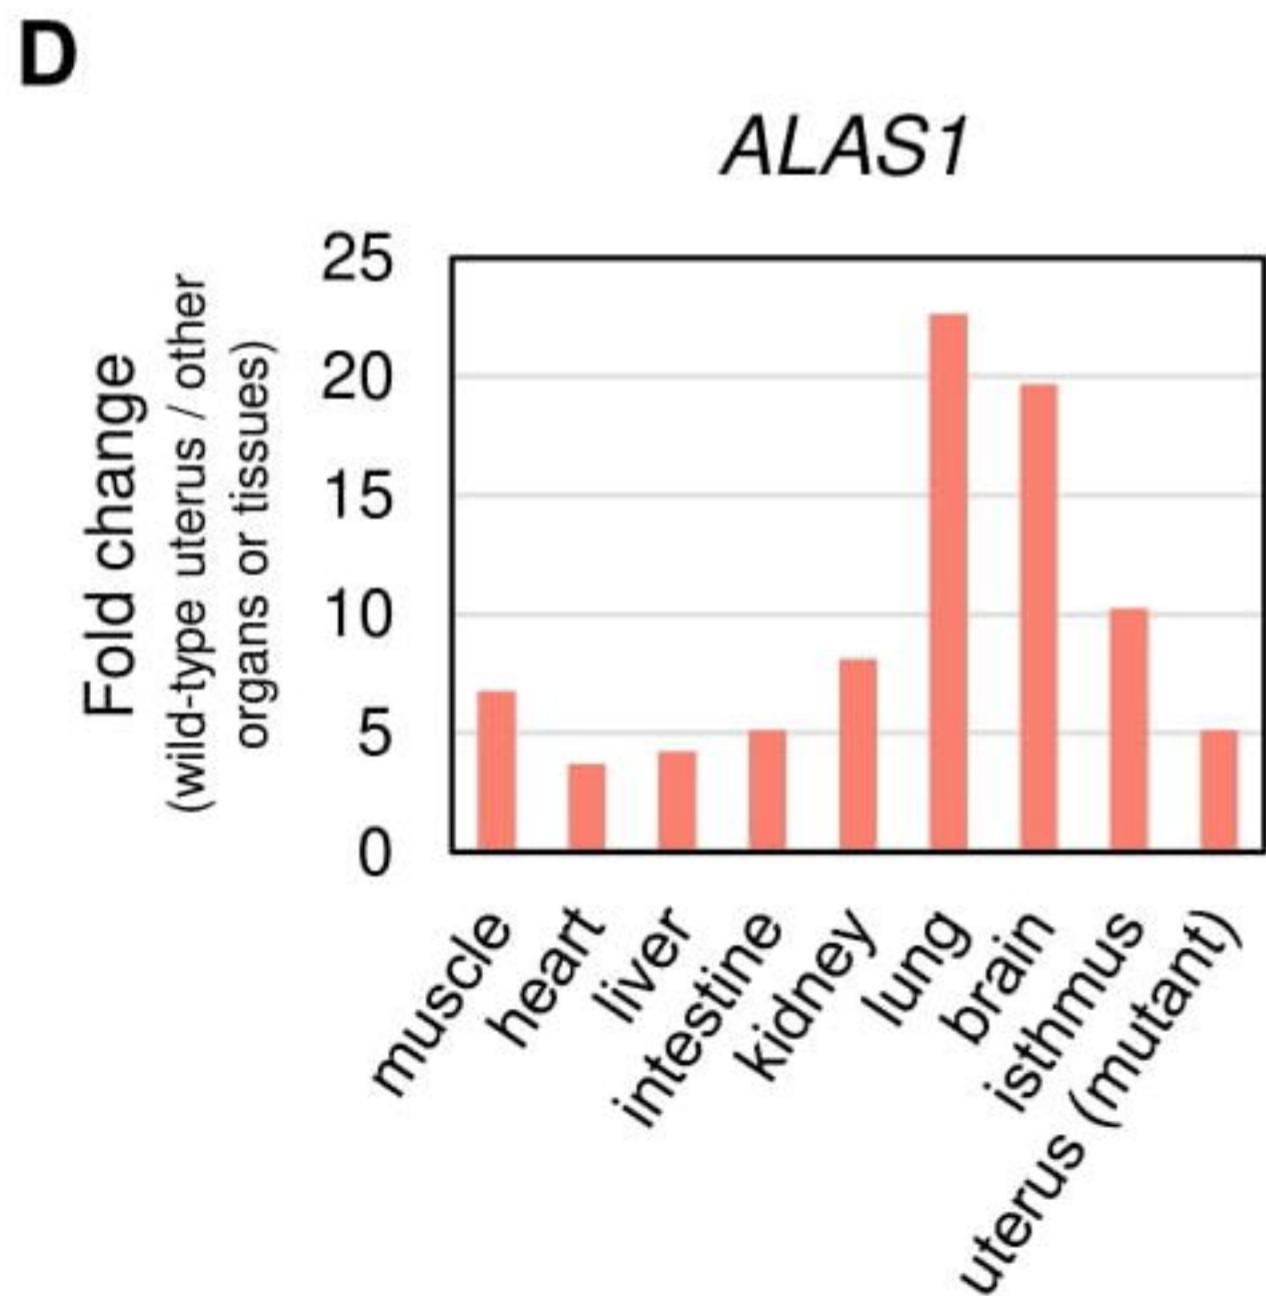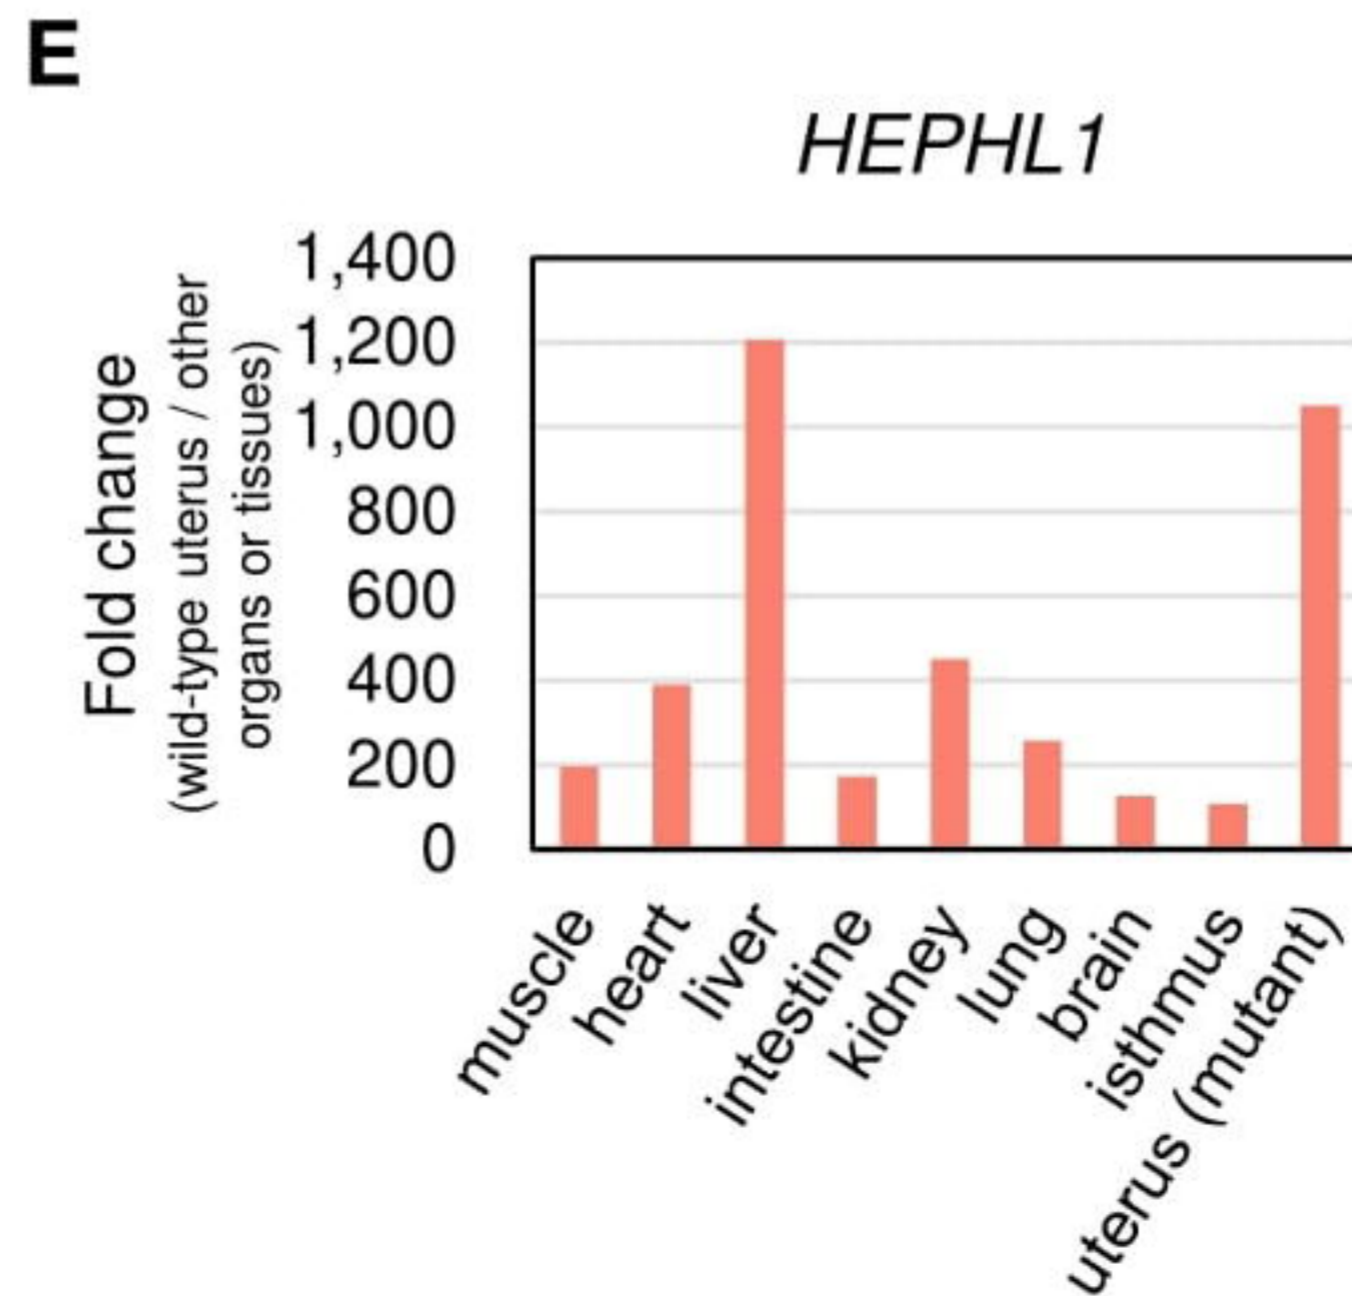



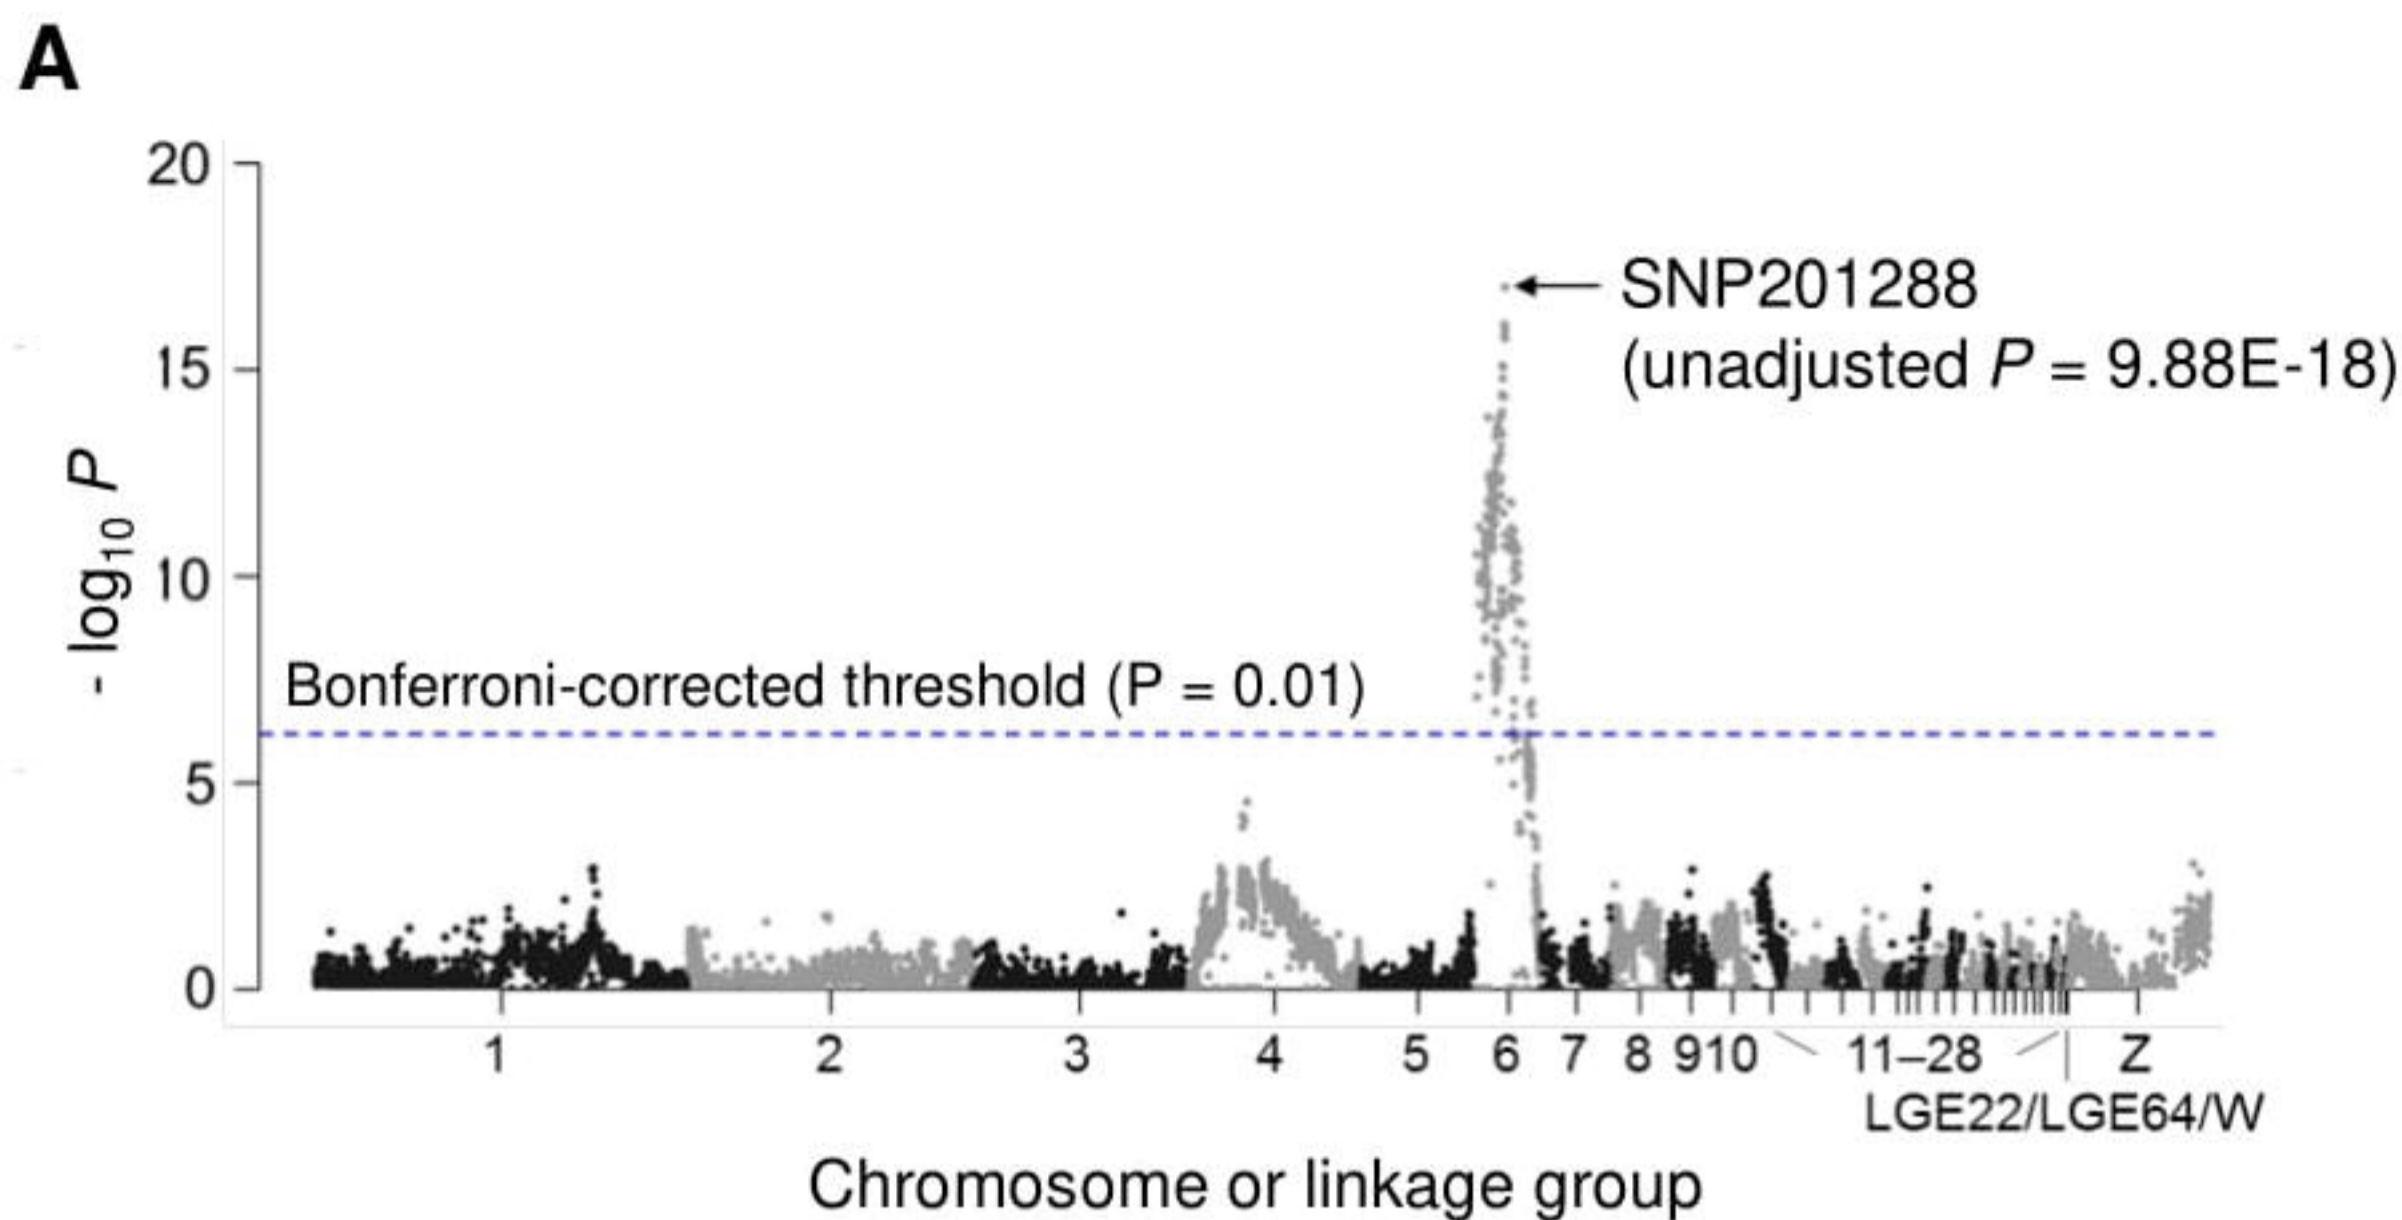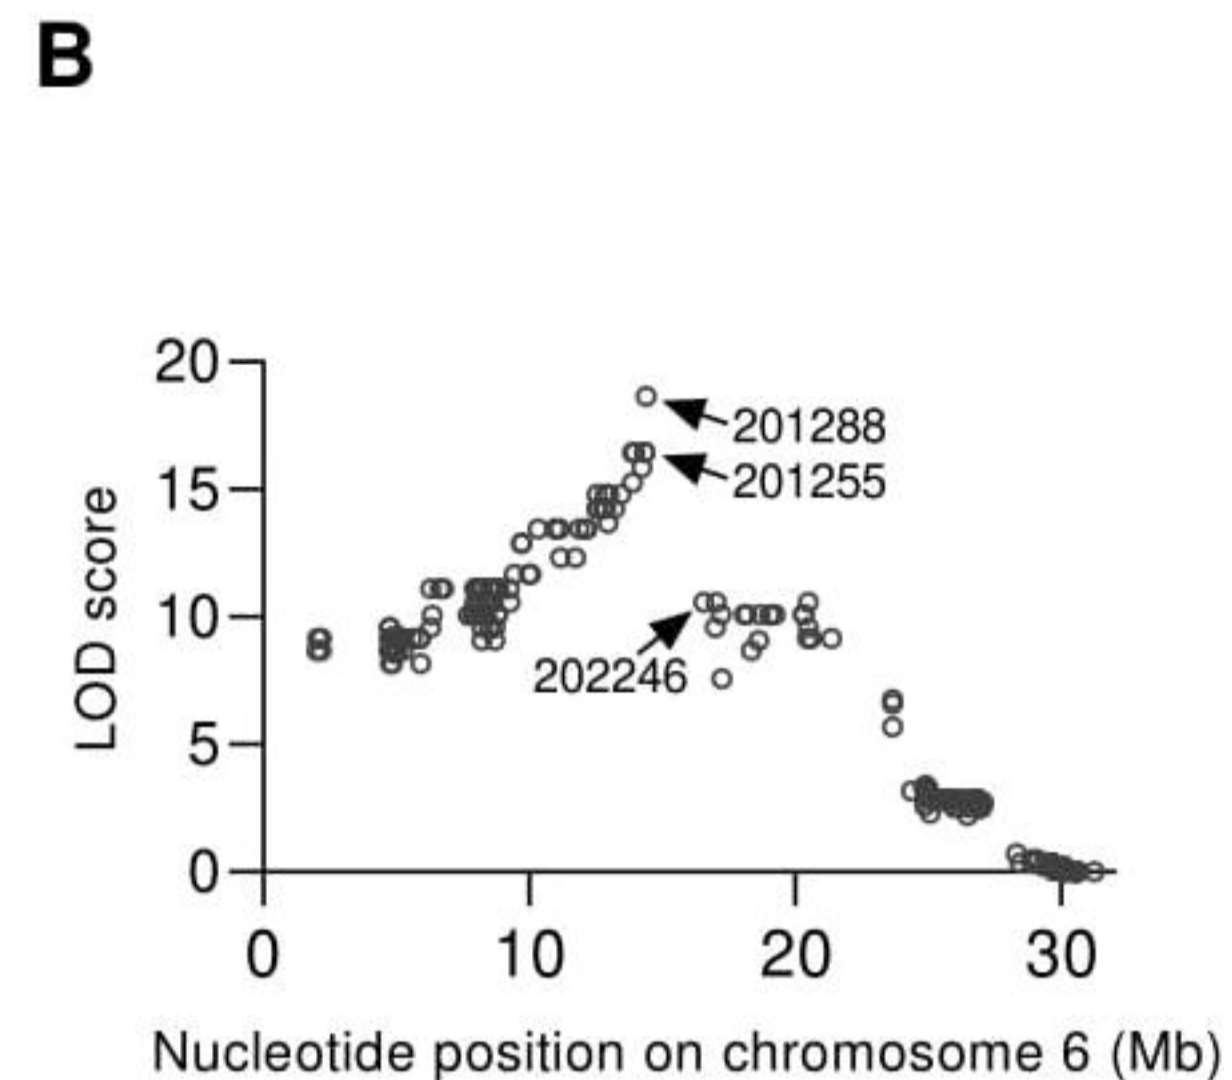

**C**

bioRxiv preprint doi: <https://doi.org/10.1101/2021.09.15.460419>; this version posted September 16, 2021. The copyright holder for this preprint (which was not certified by peer review) is the author/funder, who has granted bioRxiv a license to display the preprint in perpetuity. It is made available under aCC-BY 4.0 International license.

| SNP    | Nucleotide position (bp) | LOD score | Recombination frequency |
|--------|--------------------------|-----------|-------------------------|
| 201255 | 14,339,714               | 16.44     | 0.02                    |
| 201288 | 14,389,198               | 18.66     | 0                       |
| 202246 | 16,570,239               | 10.59     | 0.08                    |

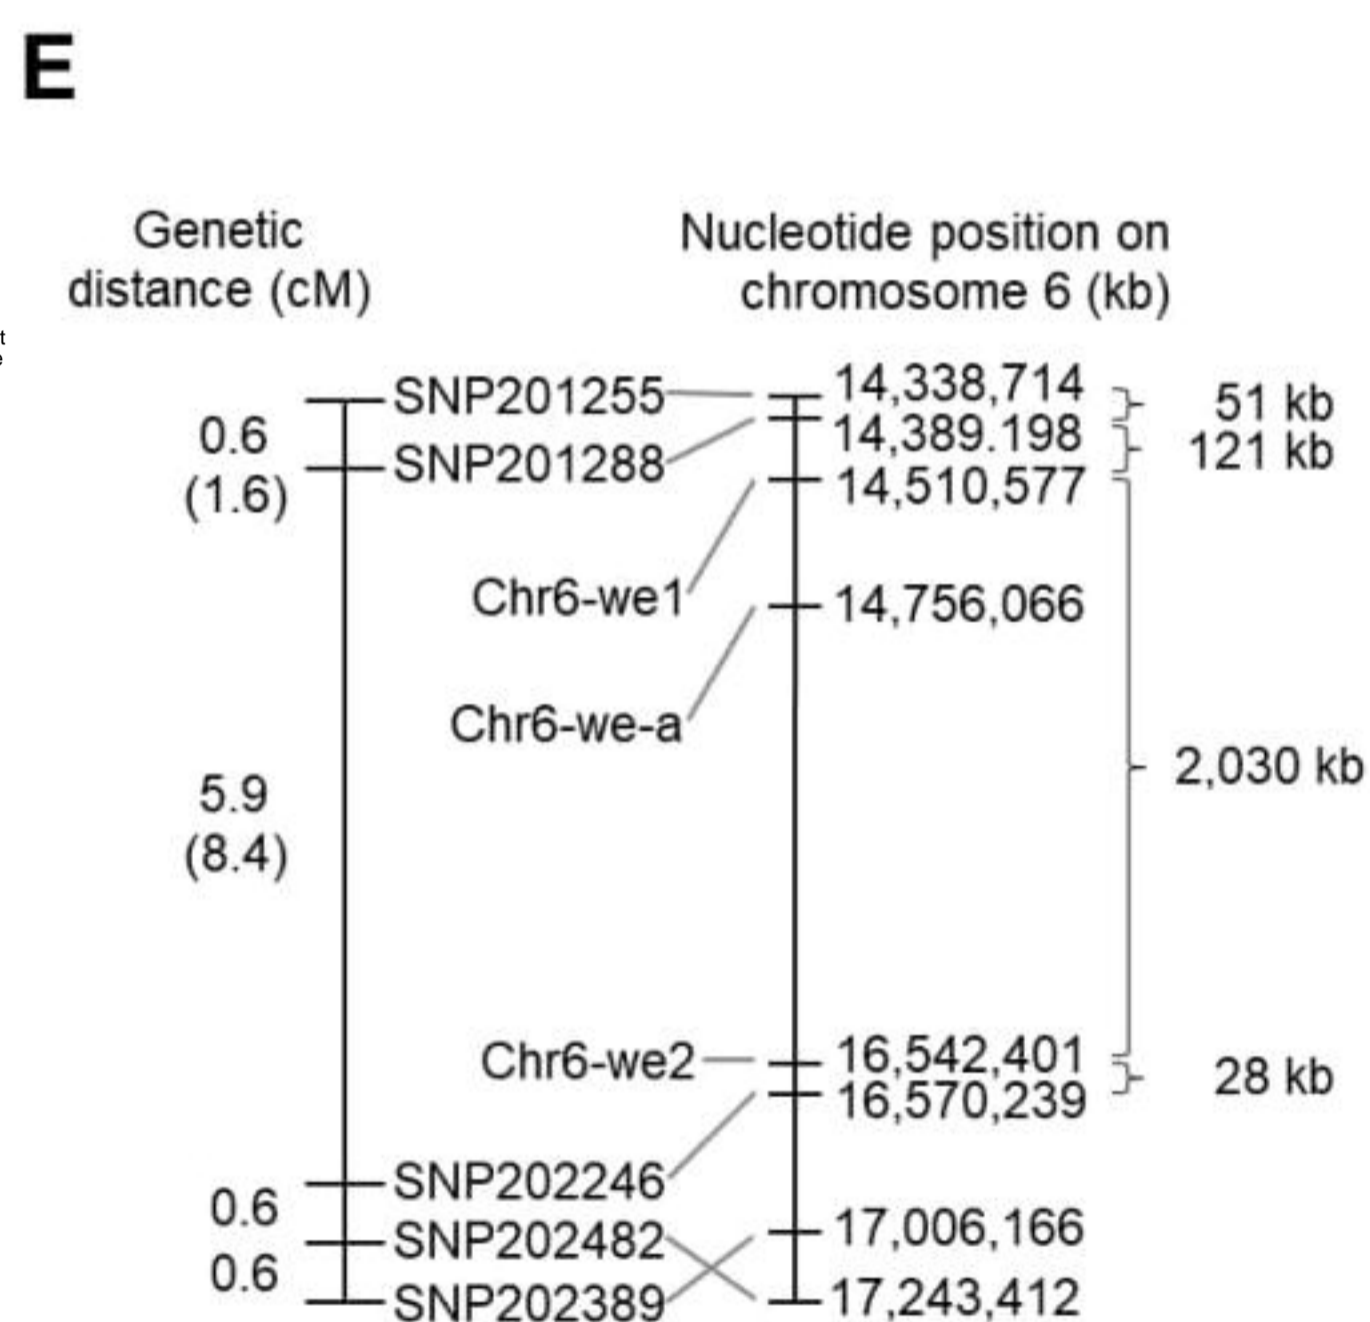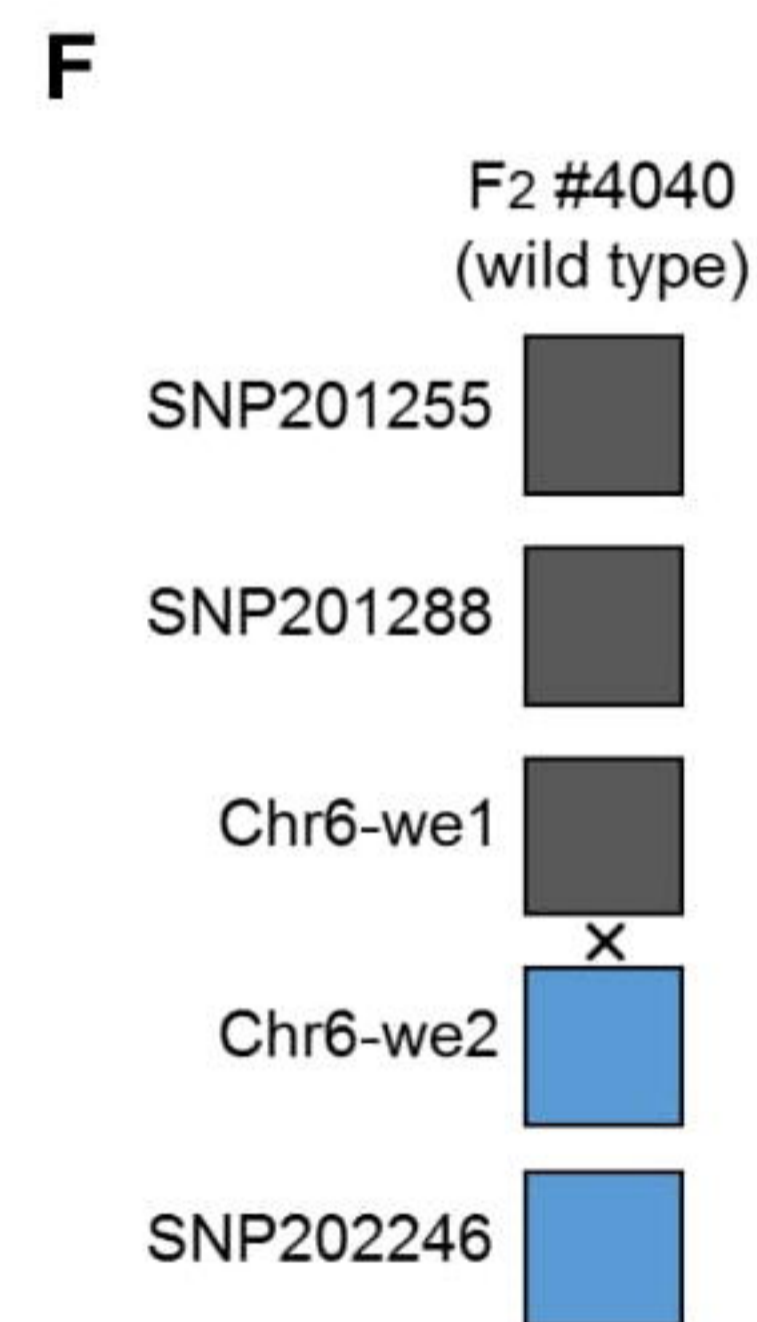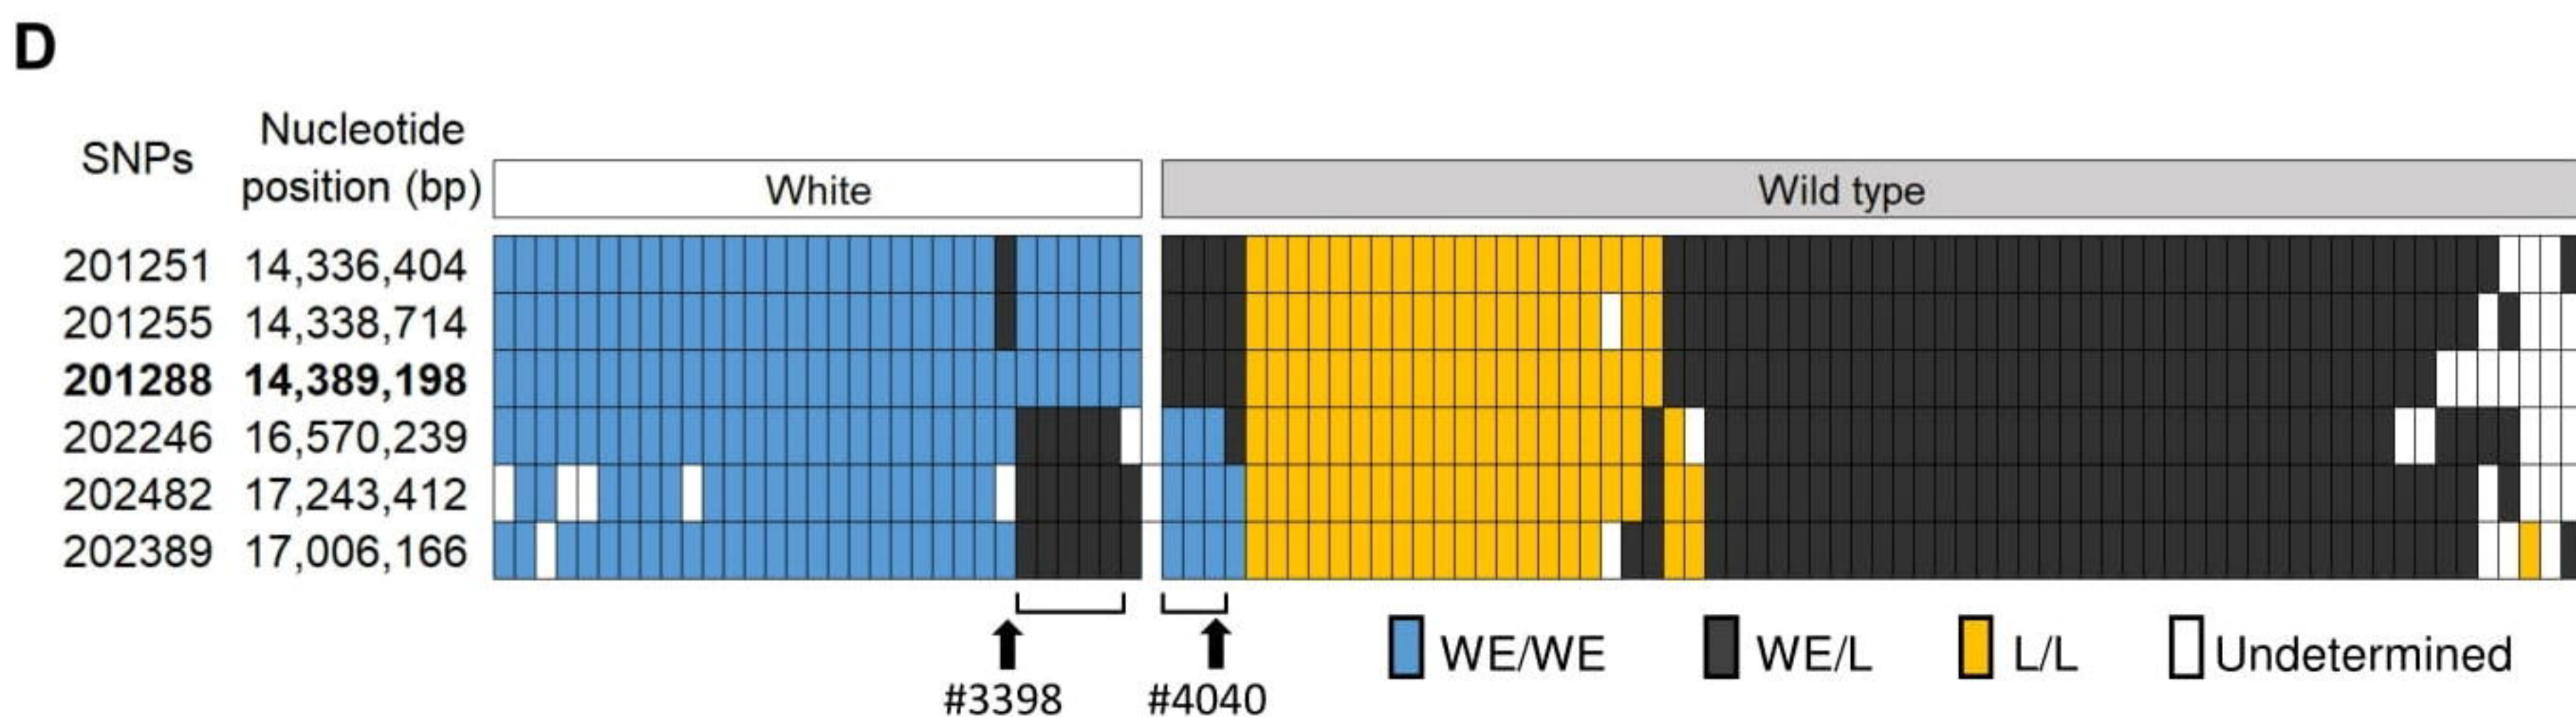

**A**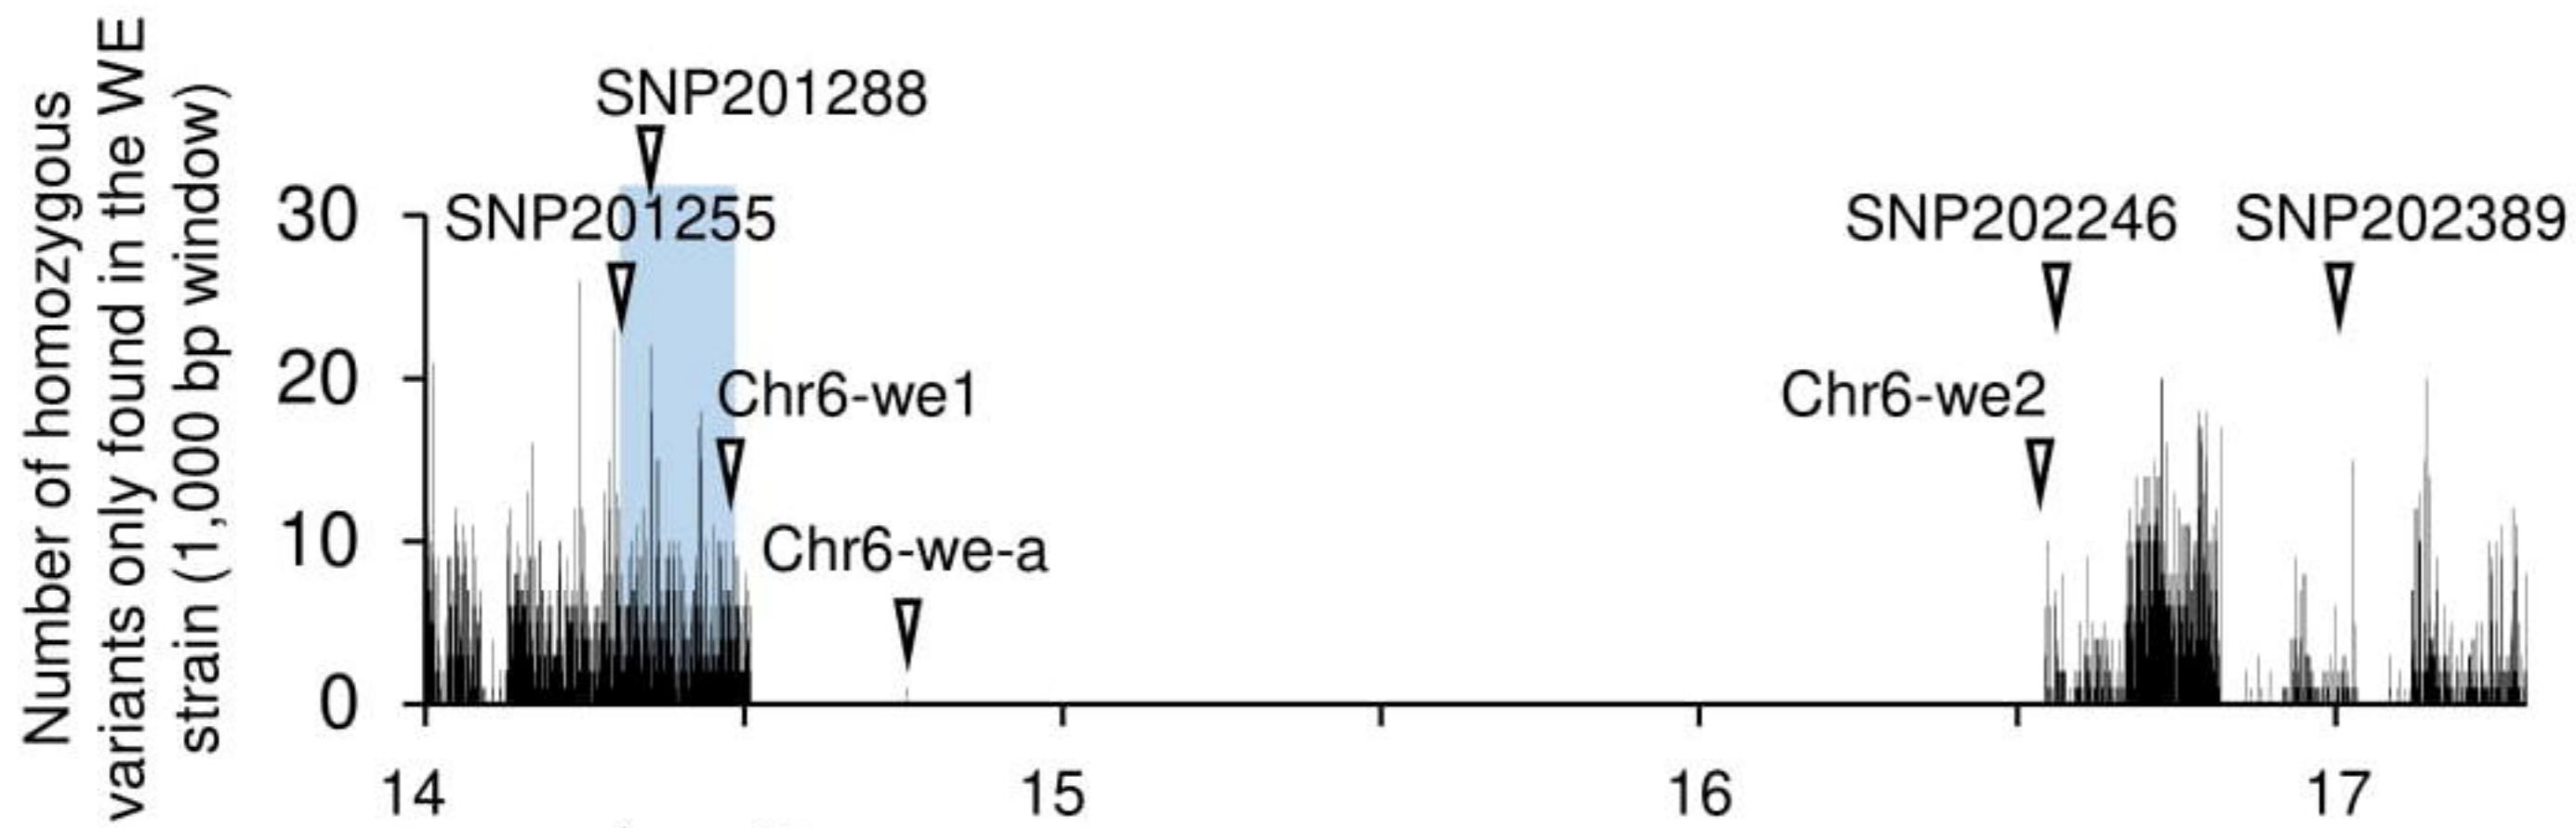**B**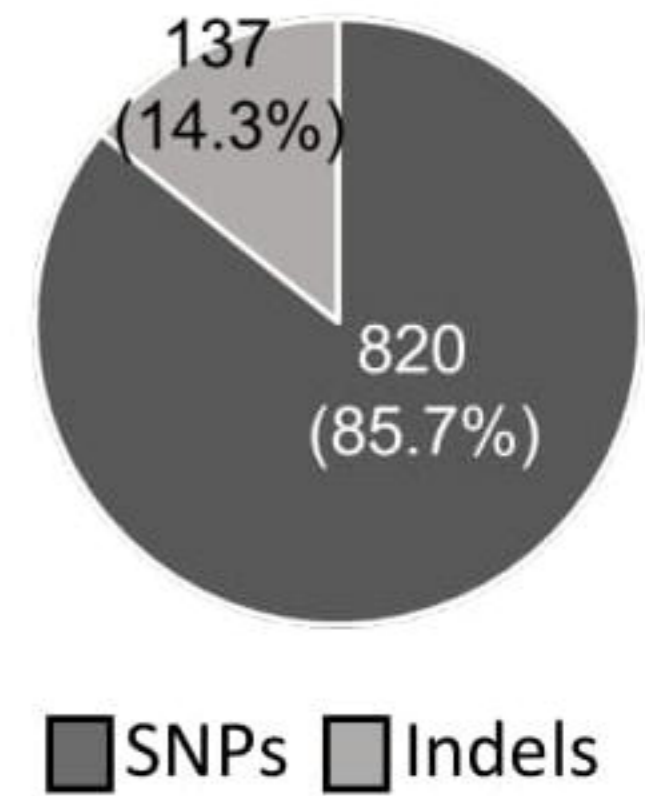**C**

Candidate region (172 kb)

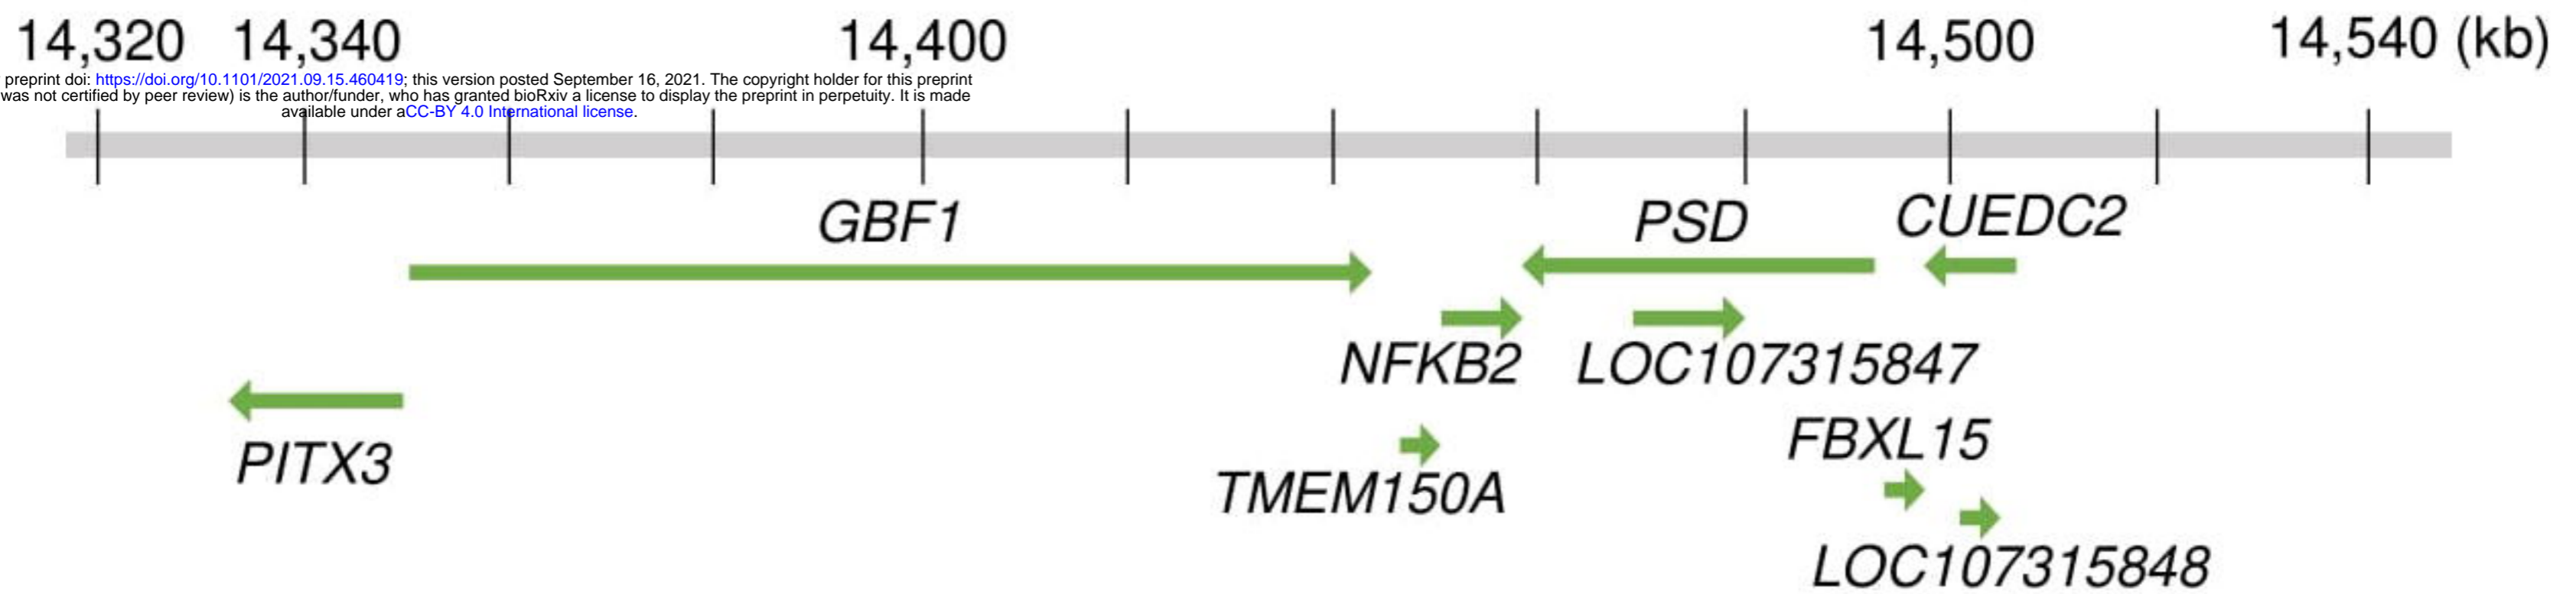**D**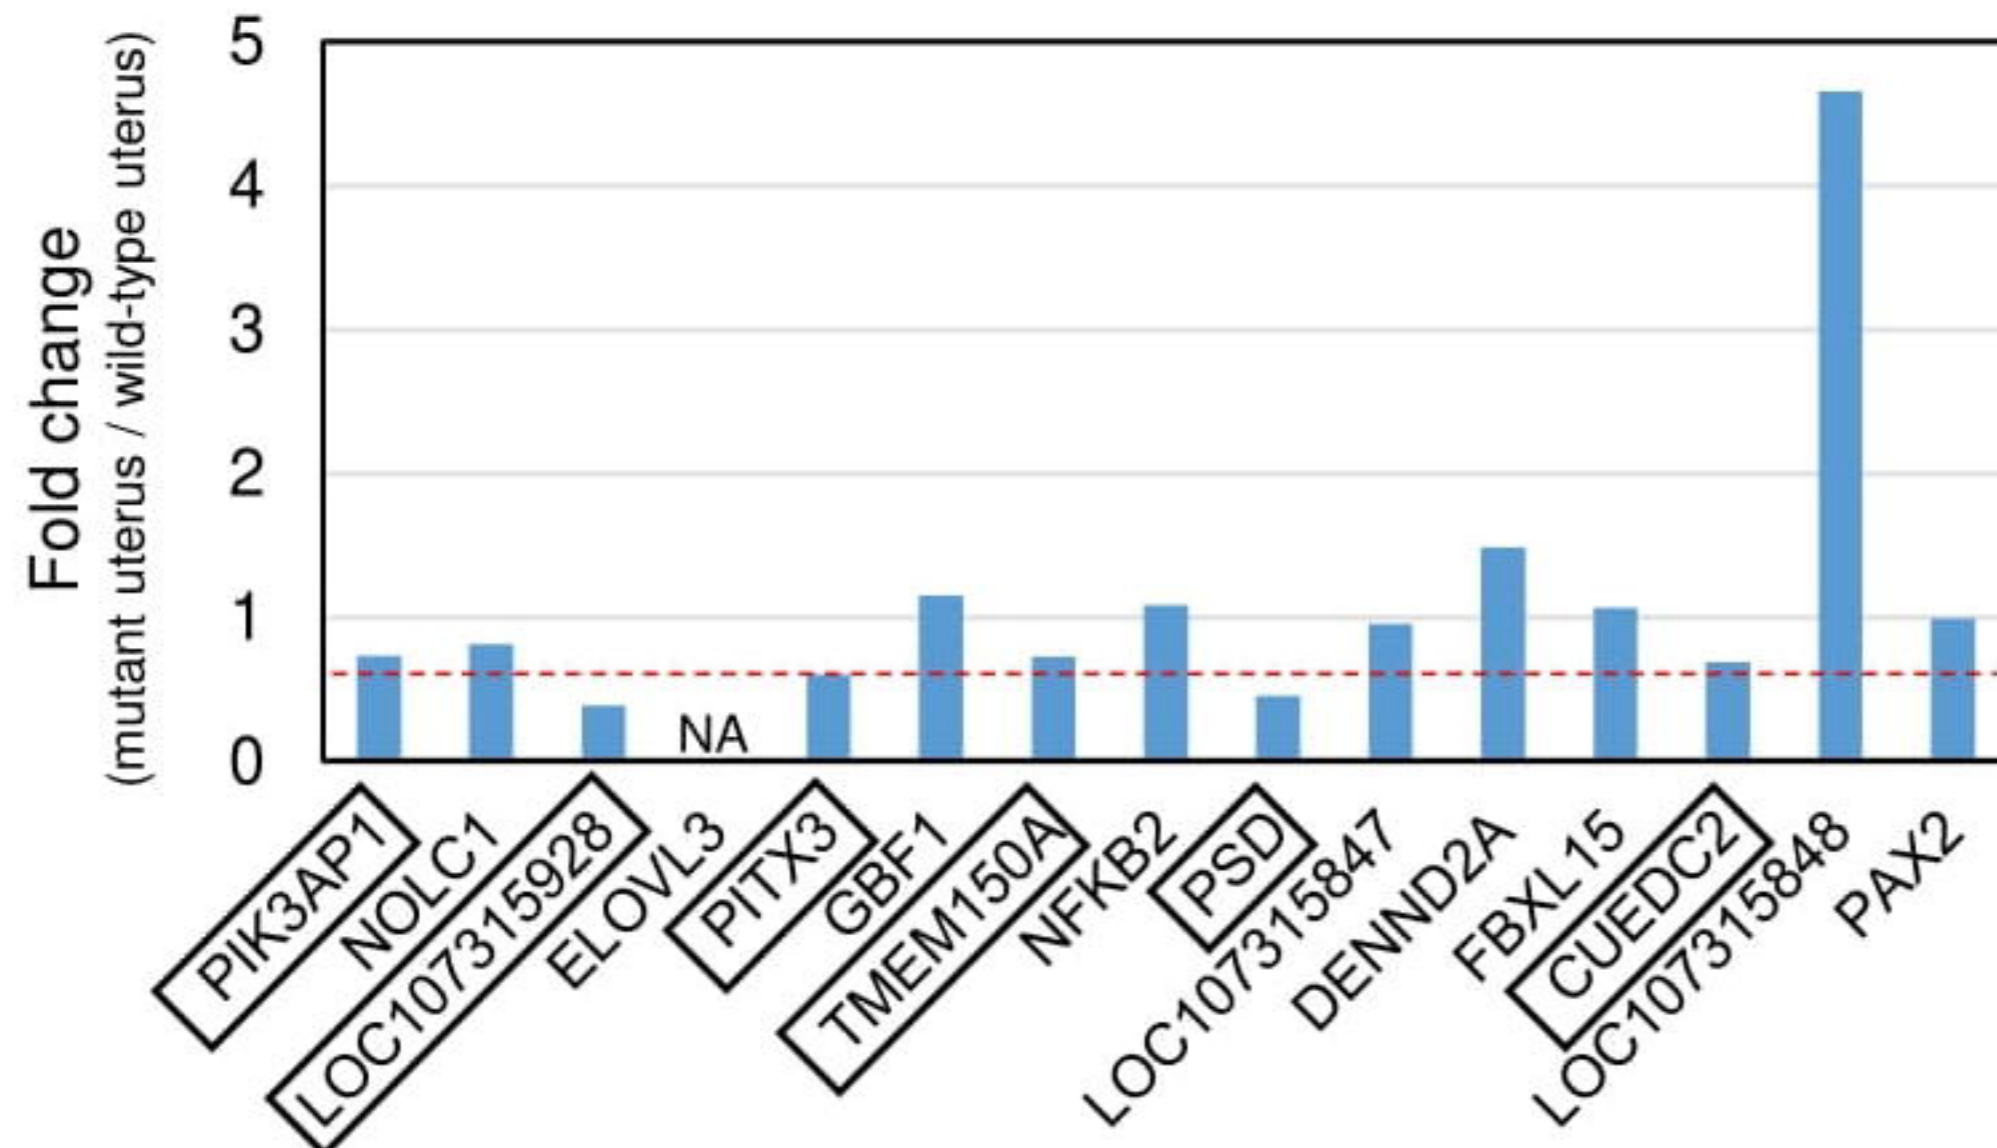**E**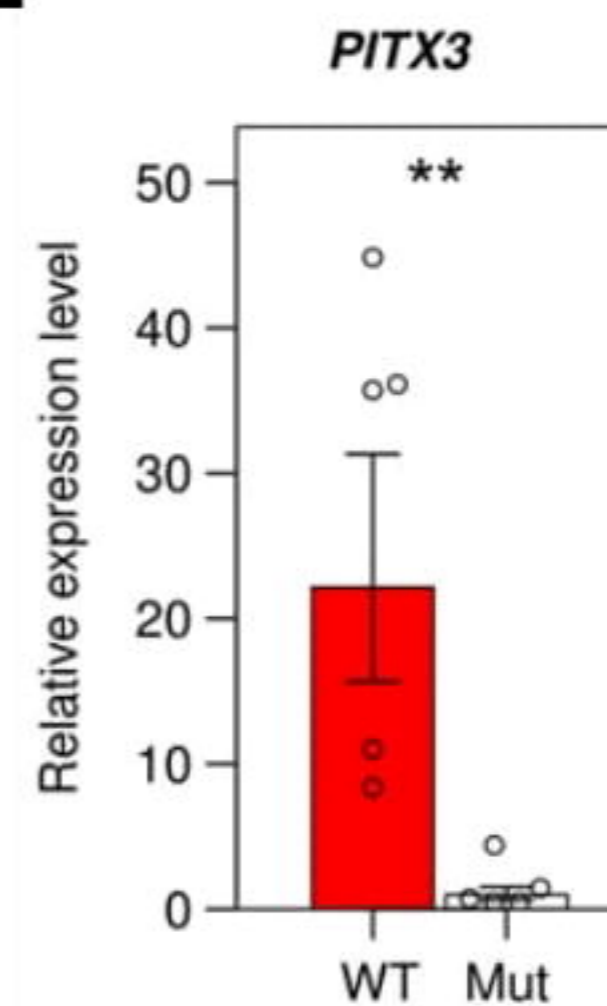

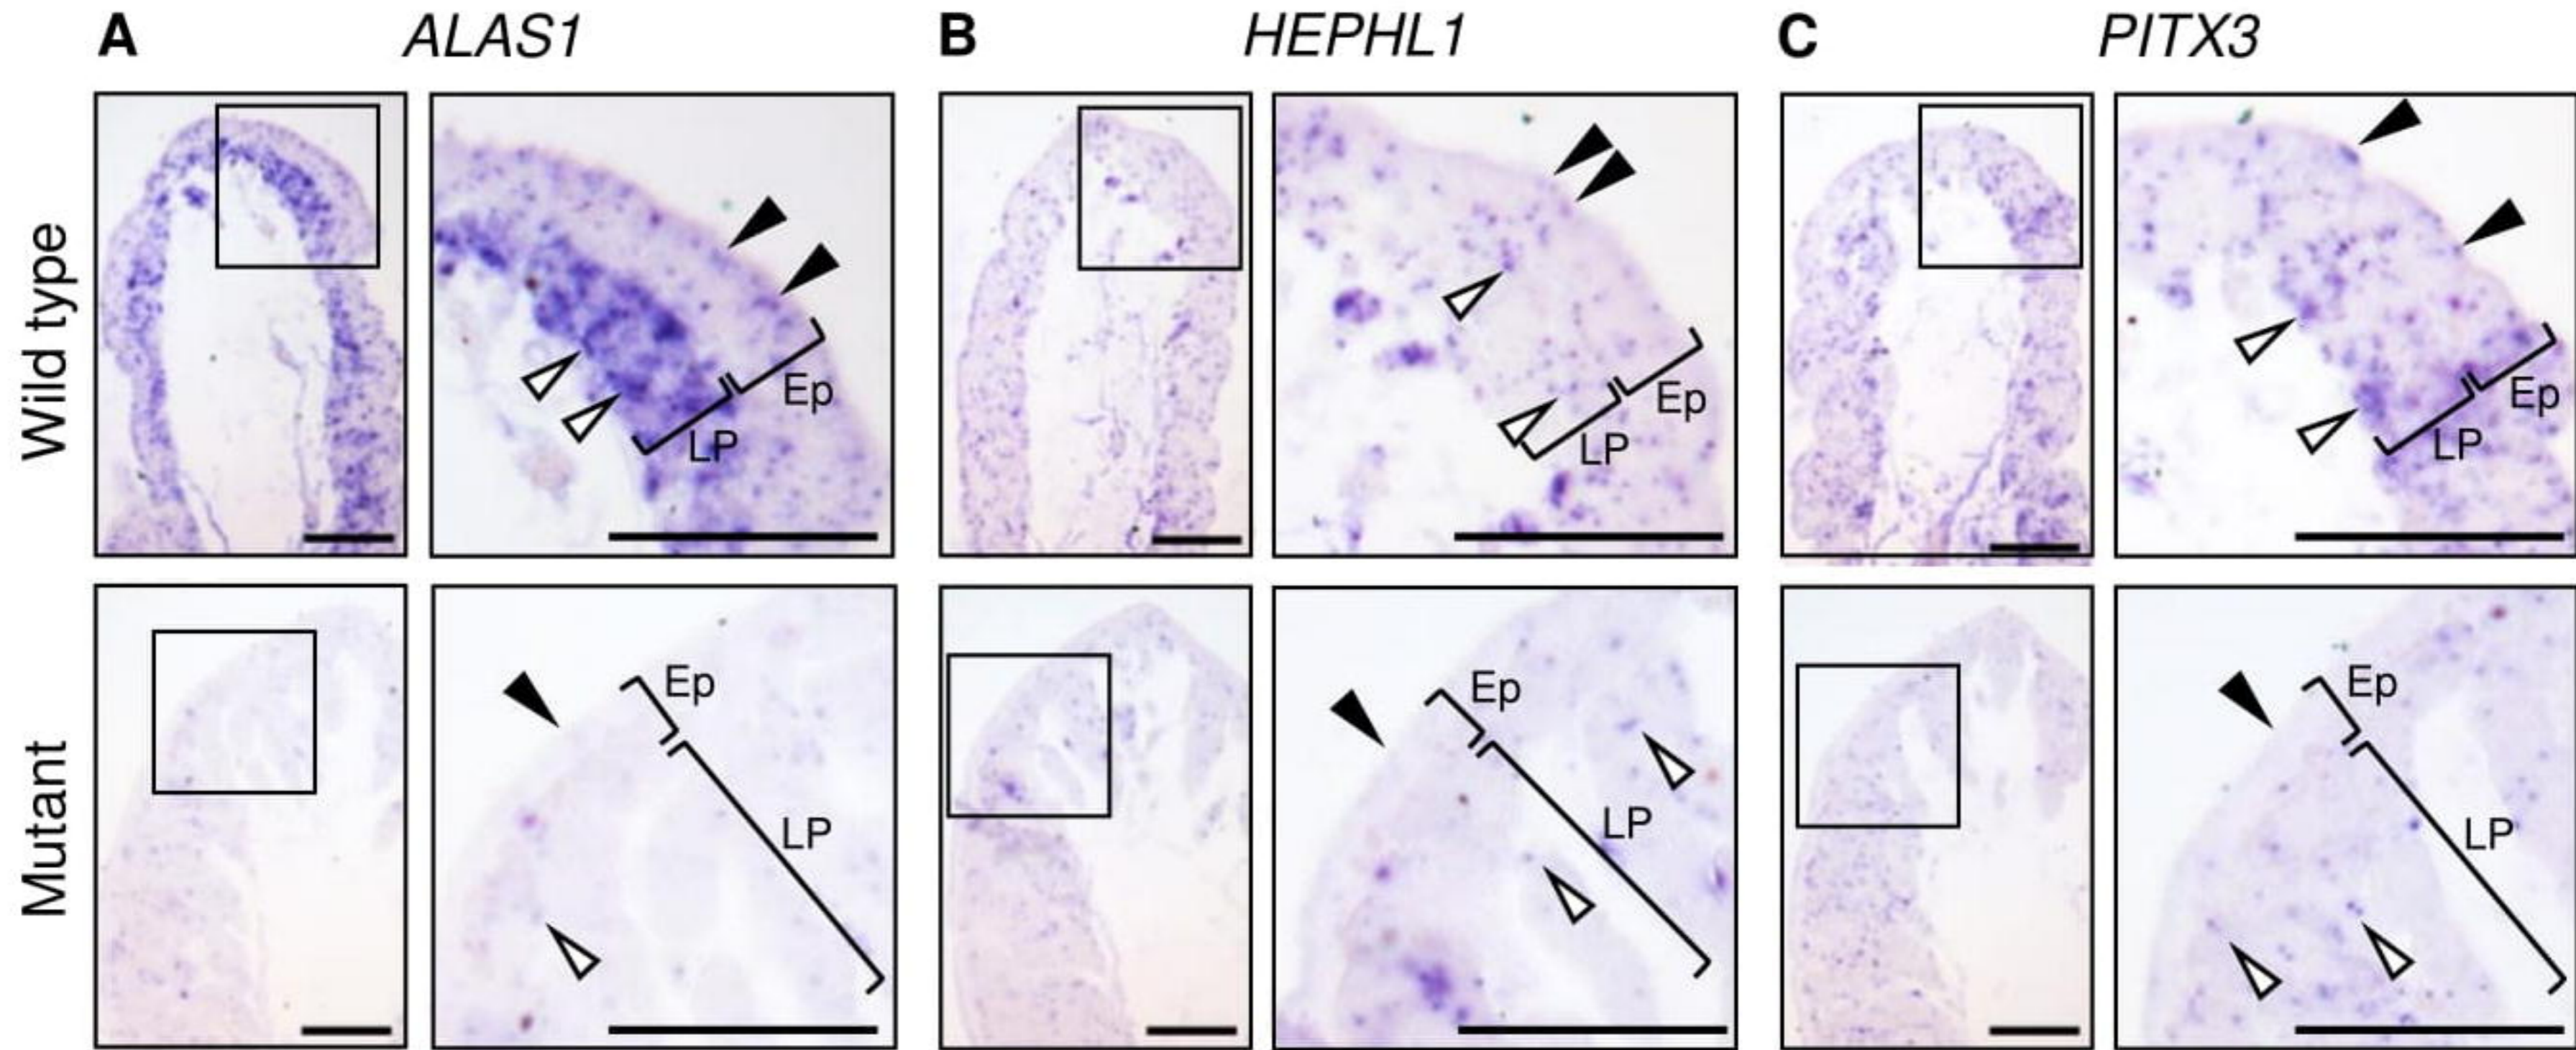

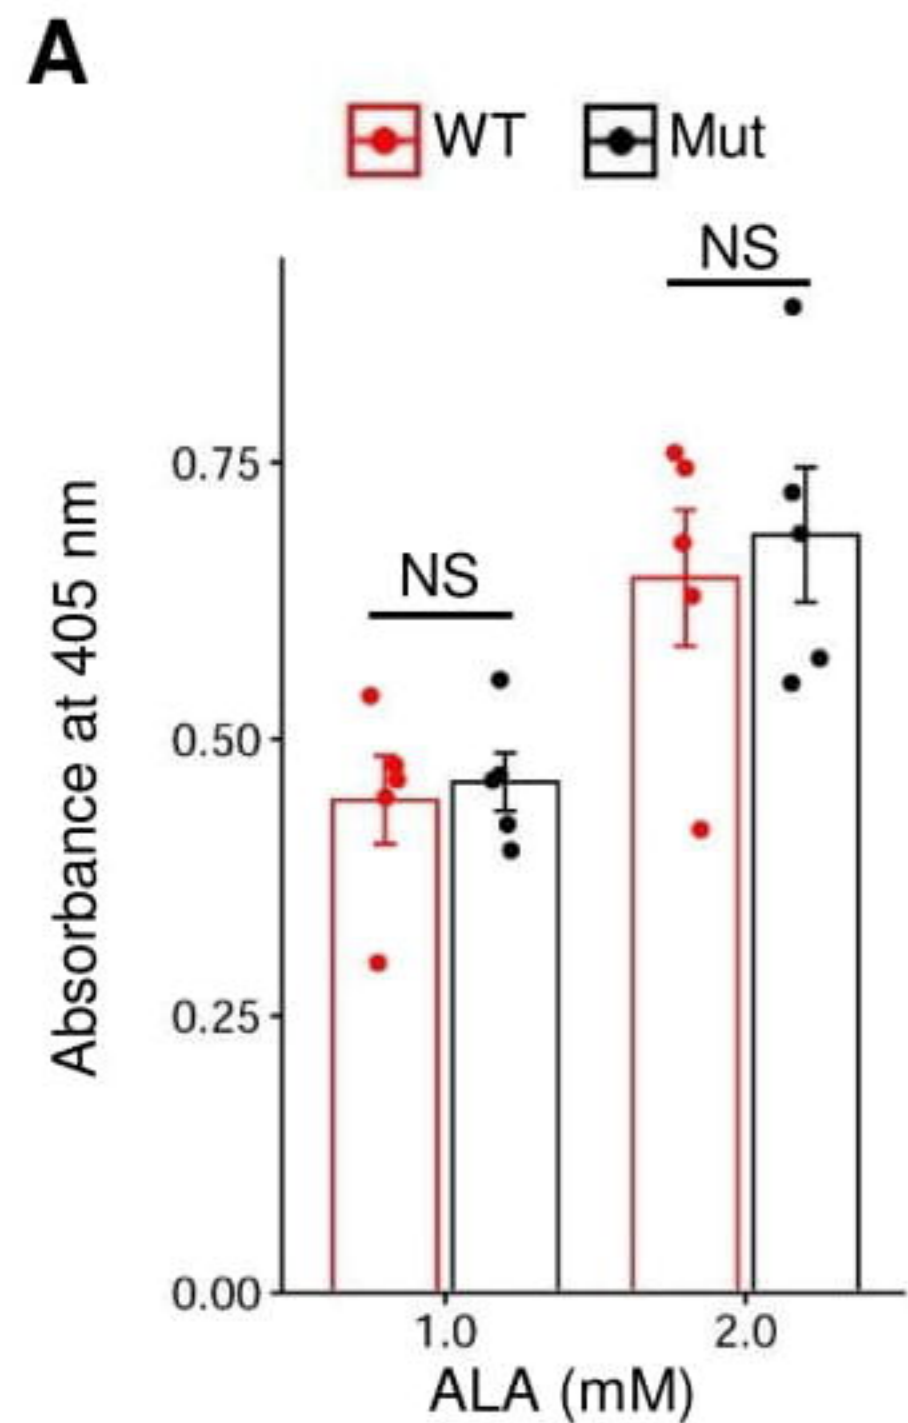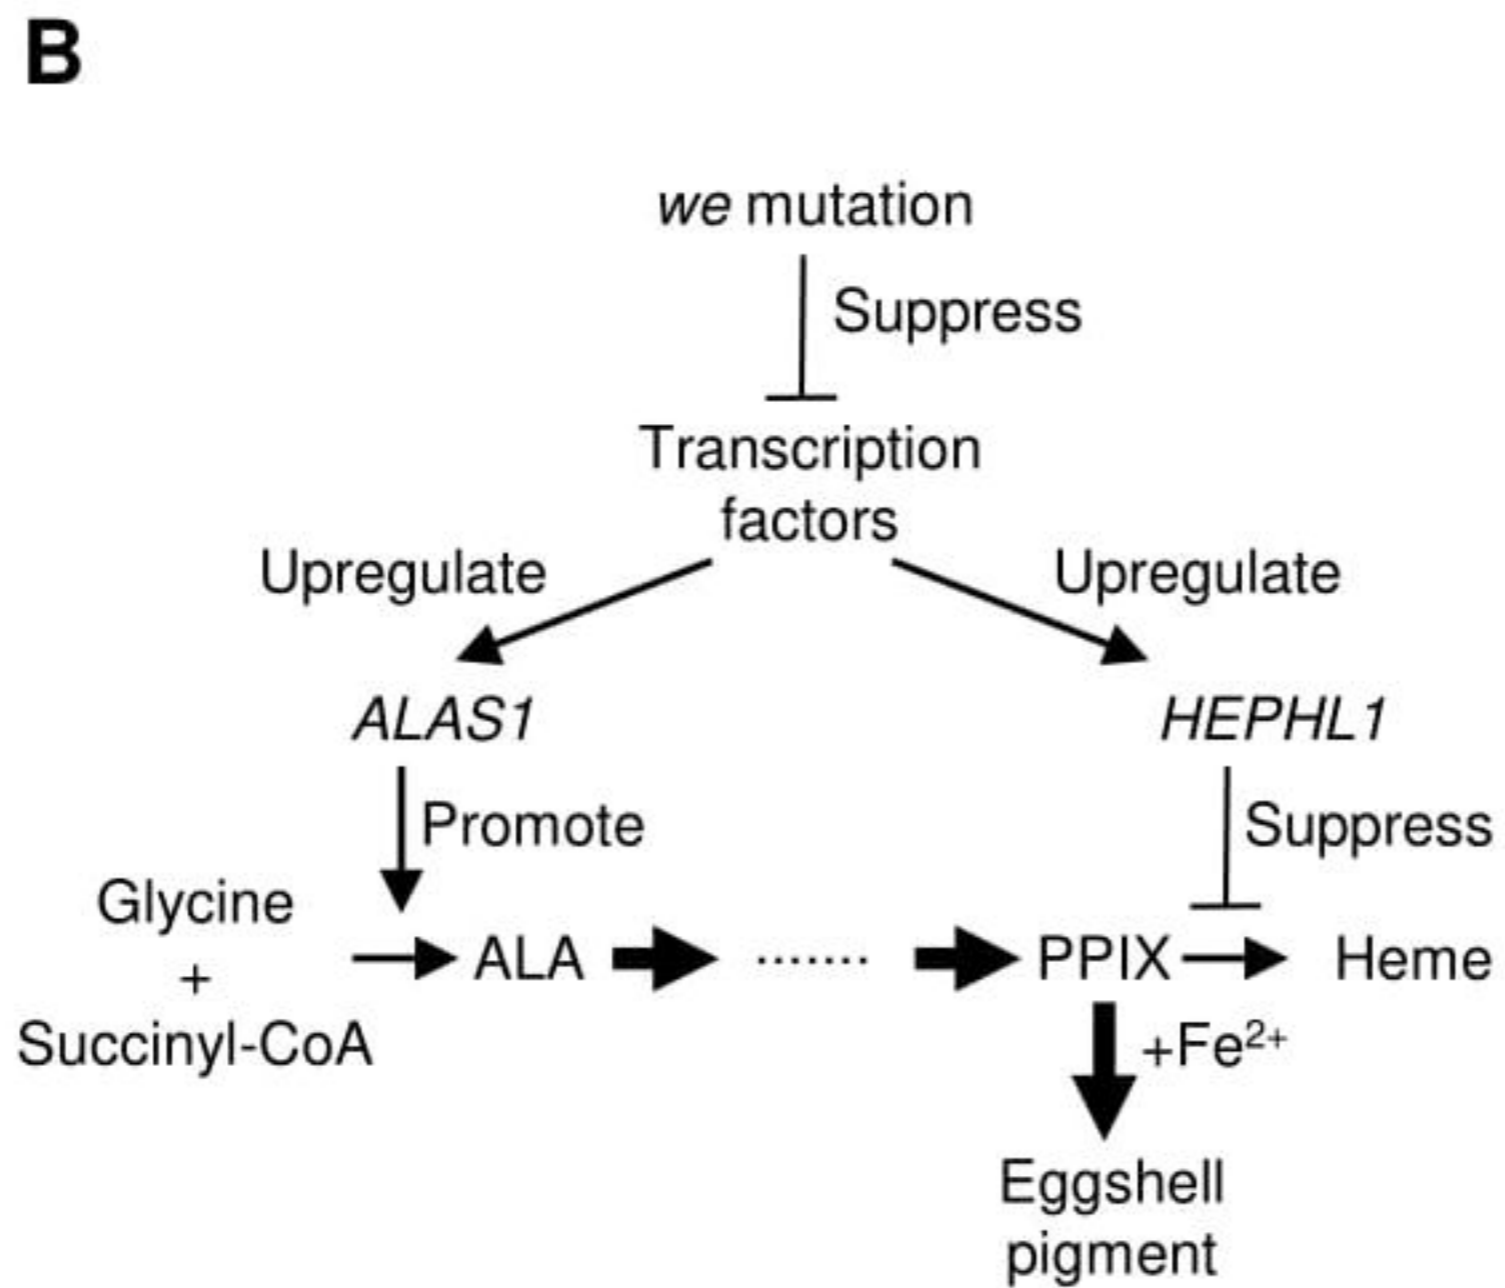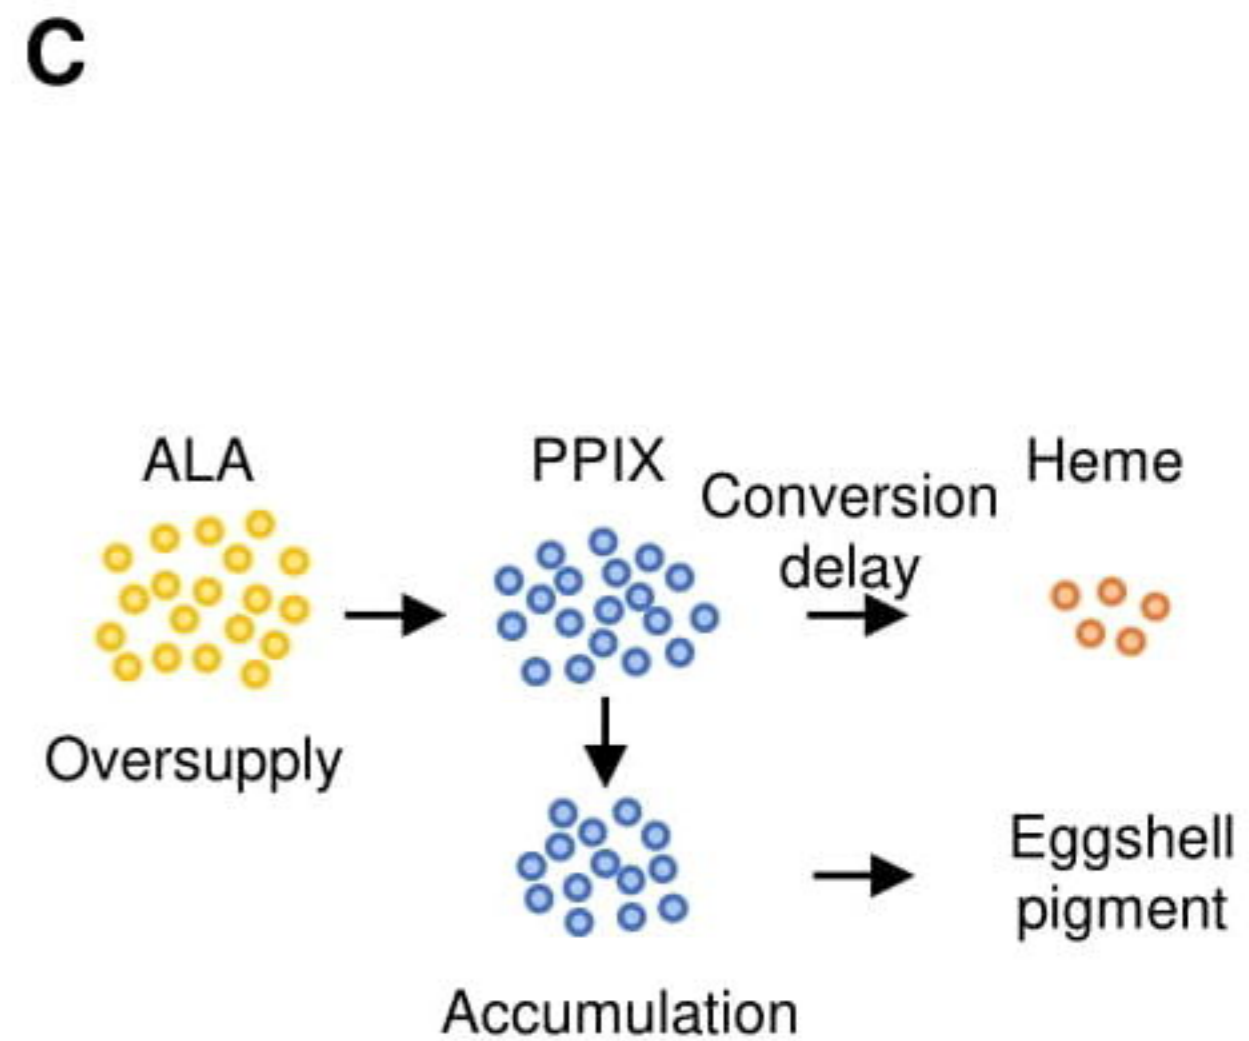

Source: https://biorxiv.org/content/10.1101/2021.09.15.460419v1.full.pdf
